# Supplementary material
Source: publisher site journal article supplement (https://www.dovepress.com/article/120800)
Supplement: Supplementary file 1 [file get_supplementary_file.php]

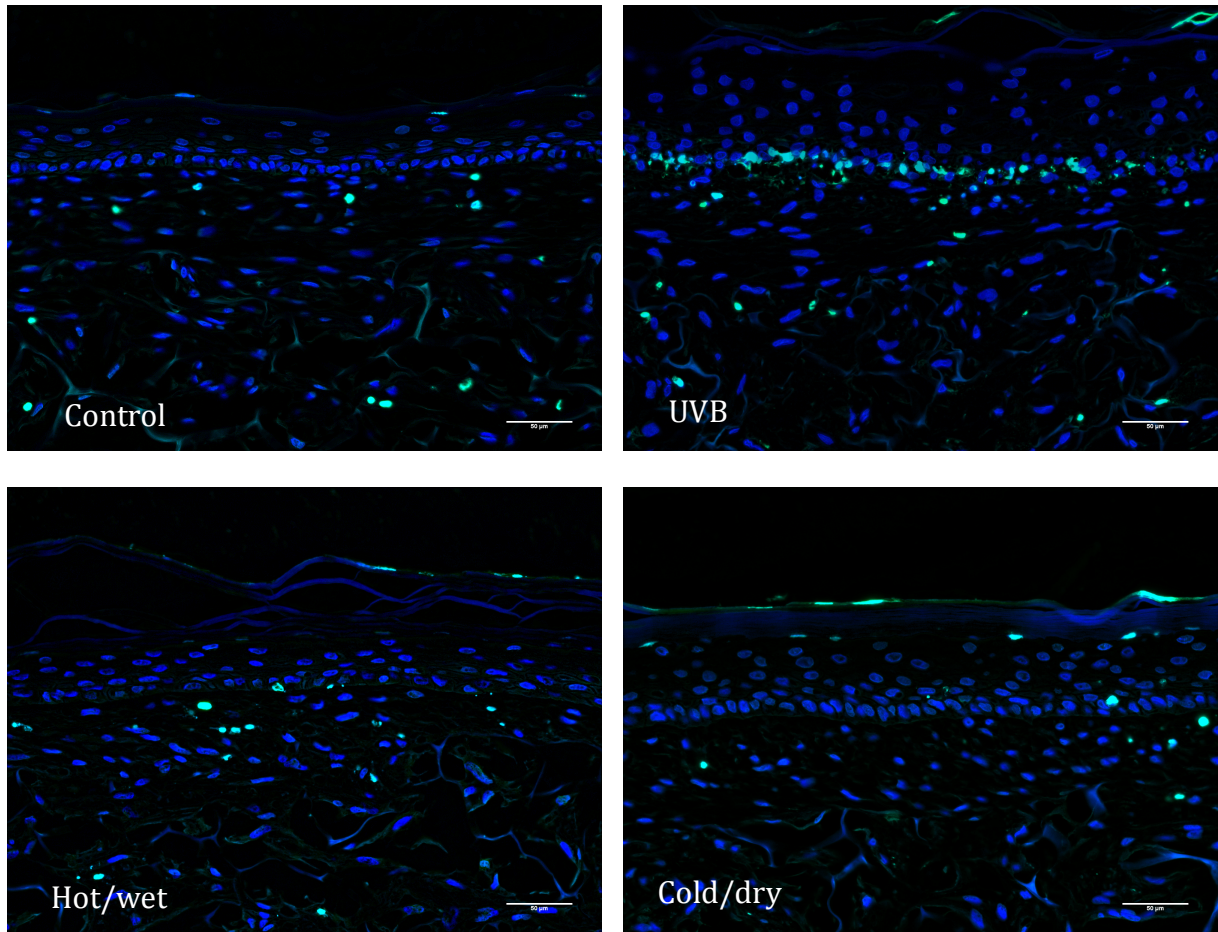

**Figure S1:** Apoptosis TUNEL assay of skins equivalents cultured with control conditions, control condition and exposed to UVB, hot/wet conditions, cold/dry conditions. The apoptotic cells are labeled in green, cell nuclei labeled with DAPI appear in blue. Scale bar: 50 µm.

**Table SI:** list of oligonucleotides used in QPCR experiments

| <b>Gene</b> | <b>Forward primer</b> | <b>Reverse primer</b> |
|-------------|-----------------------|-----------------------|
| LCE1A       | TGCAAGAGTGGCTGAGATGC  | AGACAACACAGTTGGTGT    |
| LCE1DE      | TGAATAGCTGAGAGGTTC    | CAGCCATGGATCTGCAGAAG  |
| LCE5A       | CTGATGCTAGGTCAGGACTGA | TGGTCCTGAGAAGCACTCTAC |
| COL4A1      | CCAGGATTTCAAGGTCCAAA  | CTCCCCTTTGATGATGTCGT  |
| LUM         | TGGCATTGATTGGTGGTACCA | TGGGTAGCTTTCAGGGCAGTT |
| FOS         | CAAGCGGAGACAGACCAACT  | AGTCAGATCAAGGGAAGCCA  |

**Table SII – Part I: genes significantly modulated after treatment 1 (hot-wet)**

| <b>p-value<br/>(Treat-1_vs_CTRL)</b> | <b>Fold change<br/>(Treat-1_vs_CTRL)</b> | <b>Gene Symbol</b> | <b>Description</b>                                                                                              |
|--------------------------------------|------------------------------------------|--------------------|-----------------------------------------------------------------------------------------------------------------|
| 0,001147884                          | 15,61495918                              | MIR639             | Homo sapiens microRNA 639 (MIR639), microRNA.                                                                   |
| 0,021880609                          | 12,6104707                               | LOC642685          | PREDICTED: Homo sapiens similar to maternal G10 transcript (LOC642685), mRNA.                                   |
| 0,010879477                          | 8,858661664                              | LOC389365          | PREDICTED: Homo sapiens hypothetical LOC389365 (LOC389365), mRNA.                                               |
| 0,022200861                          | 6,339924039                              | HS.566764          | DKFZp781A1072_s1 781 (synonym: hlcc4) Homo sapiens cDNA clone DKFZp781A1072 3, mRNA sequence                    |
| 0,022672172                          | 5,826114515                              | DKK4               | Homo sapiens dickkopf homolog 4 (Xenopus laevis) (DKK4), mRNA.                                                  |
| 0,036661342                          | 5,448113208                              | SLC25A29           | Homo sapiens solute carrier family 25, member 29 (SLC25A29), nuclear gene encoding mitochondrial protein, mRNA. |
| 0,035172618                          | 5,141273735                              | LOC100128361       | PREDICTED: Homo sapiens similar to hCG1985411 (LOC100128361), mRNA.                                             |
| 0,01471108                           | 4,783488094                              | LOC652119          | PREDICTED: Homo sapiens similar to putative DUX4 protein (LOC652119), mRNA.                                     |
| 0,009233667                          | 4,511367872                              | REPS1              | Homo sapiens RALBP1 associated Eps domain containing 1 (REPS1), mRNA.                                           |
| 0,031513664                          | 4,407256363                              | LOC283314          | PREDICTED: Homo sapiens misc_RNA (LOC283314), miscRNA.                                                          |
| 0,010390588                          | 3,970881226                              | LOC642773          | PREDICTED: Homo sapiens similar to Myc-associated zinc finger protein (MAZI)                                    |
| 0,006806623                          | 3,764373992                              | LOC391132          | PREDICTED: Homo sapiens misc_RNA (LOC391132), miscRNA.                                                          |
| 0,025247792                          | 3,671307506                              | HS.359754          | wg84h06.x1 Soares_NSF_F8_9W_OT_PA_P_S1 Homo sapiens cDNA clone IMAGE:2371835 3, mRNA sequence                   |
| 0,041015951                          | 3,645990047                              | RNF40              | Homo sapiens ring finger protein 40 (RNF40), transcript variant 2, mRNA.                                        |
| 0,029203217                          | 3,532079646                              | POMC               | Homo sapiens proopiomelanocortin (POMC), transcript variant 1, mRNA.                                            |
| 0,022273302                          | 3,441068318                              | ADPRH              | Homo sapiens ADP-ribosylarginine hydrolase (ADPRH), mRNA.                                                       |
| 0,040021714                          | 3,34969612                               | CCDC88C            | Homo sapiens coiled-coil domain containing 88C (CCDC88C), mRNA.                                                 |
| 0,044141986                          | 3,296795014                              | LOC100131769       | PREDICTED: Homo sapiens similar to phosphatidylinositol-specific phospholipase C, X domain containing 1         |
| 0,002629966                          | 3,17140825                               | LOC642503          | PREDICTED: Homo sapiens hypothetical protein LOC642503 (LOC642503), mRNA.                                       |
| 0,040885053                          | 3,086969318                              | MPEG1              | PREDICTED: Homo sapiens macrophage expressed gene 1, transcript variant 1 (MPEG1), mRNA.                        |
| 0,017565707                          | 3,002209131                              | LOC728931          | PREDICTED: Homo sapiens similar to hCG17429 (LOC728931), mRNA.                                                  |
| 0,038989322                          | 2,99719888                               | GDF1               | Homo sapiens growth differentiation factor 1 (GDF1), mRNA.                                                      |
| 0,022077718                          | 2,982349975                              | CFHR2              | Homo sapiens complement factor H-related 2 (CFHR2), mRNA.                                                       |
| 0,041227528                          | 2,980982567                              | TWIST2             | PREDICTED: Homo sapiens twist homolog 2 (Drosophila), transcript variant 2 (TWIST2), mRNA.                      |
| 0,039173636                          | 2,923630075                              | TBC1D3B            | Homo sapiens TBC1 domain family, member 3B (TBC1D3B), mRNA.                                                     |

|             |             |                |                                                                                                                |
|-------------|-------------|----------------|----------------------------------------------------------------------------------------------------------------|
| 0,011810076 | 2,894561598 | NR2E1          | Homo sapiens nuclear receptor subfamily 2, group E, member 1 (NR2E1), mRNA.                                    |
| 0,028497002 | 2,794481446 | HS.532720      | PREDICTED: Homo sapiens hypothetical gene supported by BC042100 (LOC440602), mRNA                              |
| 0,019071834 | 2,708459596 | LOC441442      | PREDICTED: Homo sapiens misc_RNA (LOC441442), miscRNA.                                                         |
| 0,00062686  | 2,689735099 | CTU2           | Homo sapiens cytosolic thiouridylase subunit 2 homolog (S. pombe) (CTU2), transcript variant 2, mRNA.          |
| 0,005879286 | 2,679978118 | NACC1          | Homo sapiens nucleus accumbens associated 1, BEN and BTB (POZ) domain containing (NACC1), mRNA.                |
| 0,010551026 | 2,652946274 | DKFZP686I15217 | Homo sapiens hypothetical protein DKFzP686I15217 (DKFzP686I15217), mRNA.                                       |
| 0,019848194 | 2,645672491 | GPR109B        | PREDICTED: Homo sapiens G protein-coupled receptor 109B, transcript variant 3 (GPR109B), mRNA.                 |
| 0,014518929 | 2,617721064 | MCF2L2         | Homo sapiens MCF.2 cell line derived transforming sequence-like 2 (MCF2L2), mRNA.                              |
| 0,014049258 | 2,603858521 | HS.123511      | qh86e12.x1 Soares_NFL_T_GBC_S1 Homo sapiens cDNA clone IMAGE:1853902 3, mRNA sequence                          |
| 0,039026708 | 2,570271558 | LOC653941      | PREDICTED: Homo sapiens similar to pleckstrin homology domain containing, family F member 2 , mRNA.            |
| 0,020553999 | 2,565894569 | IGF2BP1        | Homo sapiens insulin-like growth factor 2 mRNA binding protein 1 (IGF2BP1), transcript variant 1, mRNA.        |
| 0,001998642 | 2,493614931 | LOC641724      | PREDICTED: Homo sapiens similar to stromal antigen 3 (LOC641724), mRNA.                                        |
| 0,002172415 | 2,485942149 | FOS            | Homo sapiens v-fos FBJ murine osteosarcoma viral oncogene homolog (FOS), mRNA.                                 |
| 0,000740006 | 2,441836735 | C19ORF51       | Homo sapiens chromosome 19 open reading frame 51 (C19orf51), mRNA.                                             |
| 0,027136686 | 2,428548439 | LOC100132354   | Homo sapiens hypothetical LOC100132354 (LOC100132354), non-coding RNA.                                         |
| 0,030599241 | 2,422560976 | C11ORF44       | PREDICTED: Homo sapiens chromosome 11 open reading frame 44 (C11orf44), miscRNA.                               |
| 0,00557602  | 2,382090412 | ZNF692         | Homo sapiens zinc finger protein 692 (ZNF692), transcript variant 2, mRNA.                                     |
| 0,04119647  | 2,358478317 | ACRV1          | Homo sapiens acrosomal vesicle protein 1 (ACRV1), transcript variant 11, mRNA.                                 |
| 0,001775609 | 2,346609939 | CLDND2         | Homo sapiens claudin domain containing 2 (CLDND2), mRNA.                                                       |
| 0,014213449 | 2,341457753 | TRNAU1AP       | Homo sapiens tRNA selenocysteine 1 associated protein 1 (TRNAU1AP), transcript variant 2, transcribed RNA.     |
| 0,037336584 | 2,324081314 | SEMA7A         | Homo sapiens semaphorin 7A, GPI membrane anchor (John Milton Hagen blood group) (SEMA7A), mRNA.                |
| 0,013045988 | 2,306694427 | TTC7B          | Homo sapiens tetratricopeptide repeat domain 7B (TTC7B), mRNA.                                                 |
| 0,030308991 | 2,300679895 | ELOVL3         | Homo sapiens elongation of very long chain fatty acids (FEN1/Elo2, SUR4/Elo3, yeast)-like 3 (ELOVL3), mRNA.    |
| 0,023001018 | 2,286523554 | LOC654126      | PREDICTED: Homo sapiens similar to leucine rich repeat containing 37B, transcript variant 1 (LOC654126), mRNA. |
| 0,008312627 | 2,274900398 | C11ORF49       | Homo sapiens chromosome 11 open reading frame 49 (C11orf49), transcript variant 3, mRNA.                       |
| 0,034303235 | 2,252291242 | HS.582355      | DB338622 TESTI2 Homo sapiens cDNA clone TESTI2042012 3, mRNA sequence                                          |
| 0,016498609 | 2,245620438 | LOC100128440   | PREDICTED: Homo sapiens hypothetical protein LOC100128440 (LOC100128440), mRNA.                                |

|             |             |              |                                                                                                           |
|-------------|-------------|--------------|-----------------------------------------------------------------------------------------------------------|
| 0,030397352 | 2,235345582 | ELMOD3       | Homo sapiens ELMO/CED-12 domain containing 3 (ELMOD3), transcript variant 1, mRNA.                        |
| 0,040450004 | 2,215302102 | RMND5A       | Homo sapiens required for meiotic nuclear division 5 homolog A ( <i>S. cerevisiae</i> ) (RMND5A), mRNA.   |
| 0,041753236 | 2,203443429 | PVT1         | Homo sapiens Pvt1 oncogene (non-protein coding) (PVT1), non-coding RNA.                                   |
| 0,021148264 | 2,163141813 | HACE1        | Homo sapiens HECT domain and ankyrin repeat containing, E3 ubiquitin protein ligase 1 (HACE1), mRNA.      |
| 0,004045858 | 2,162735849 | LOC643505    | PREDICTED: Homo sapiens similar to large subunit ribosomal protein L36a (LOC643505), mRNA.                |
| 0,03501113  | 2,118957704 | RUNDC2B      | Homo sapiens RUN domain containing 2B (RUNDC2B), mRNA.                                                    |
| 0,013955125 | 2,090472456 | CARD6        | Homo sapiens caspase recruitment domain family, member 6 (CARD6), mRNA.                                   |
| 0,024512889 | 2,088338338 | LTB4R2       | Homo sapiens leukotriene B4 receptor 2 (LTB4R2), mRNA.                                                    |
| 0,049878209 | 2,06491319  | LOC644075    | PREDICTED: Homo sapiens hypothetical protein LOC644075 (LOC644075), mRNA.                                 |
| 0,016199492 | 2,061155914 | C22ORF33     | Homo sapiens chromosome 22 open reading frame 33 (C22orf33), mRNA.                                        |
| 0,019417334 | 2,044878383 | LOC100133795 | PREDICTED: Homo sapiens misc_RNA (LOC100133795), miscRNA.                                                 |
| 0,035212434 | 2,019426289 | FBXO3        | Homo sapiens F-box protein 3 (FBXO3), transcript variant 2, mRNA.                                         |
| 0,017187908 | 1,993582888 | HS.543211    | xq98e07.x1 NCI_CGAP_Brn53 Homo sapiens cDNA clone IMAGE:2758692 3, mRNA sequence                          |
| 0,014366637 | 1,988520035 | NOC2L        | Homo sapiens nucleolar complex associated 2 homolog ( <i>S. cerevisiae</i> ) (NOC2L), mRNA.               |
| 0,027398178 | 1,981833634 | GABRE        | Homo sapiens gamma-aminobutyric acid (GABA) A receptor, epsilon (GABRE), mRNA.                            |
| 0,021622273 | 1,949377916 | LASS4        | Homo sapiens LAG1 homolog, ceramide synthase 4 (LASS4), mRNA.                                             |
| 0,034860507 | 1,945693301 | GPR125       | PREDICTED: Homo sapiens G protein-coupled receptor 125, transcript variant 3 (GPR125), mRNA.              |
| 0,033382527 | 1,935579782 | LOC388255    | PREDICTED: Homo sapiens similar to Ig heavy chain V-III region VH26 precursor (LOC388255), mRNA.          |
| 0,024663201 | 1,909352715 | ZNF589       | Homo sapiens zinc finger protein 589 (ZNF589), mRNA.                                                      |
| 0,012253587 | 1,903850649 | PHACTR3      | Homo sapiens phosphatase and actin regulator 3 (PHACTR3), transcript variant 3, mRNA.                     |
| 0,027713192 | 1,901353687 | CD164L2      | Homo sapiens CD164 sialomucin-like 2 (CD164L2), mRNA.                                                     |
| 0,039519611 | 1,885418187 | CLDN14       | Homo sapiens claudin 14 (CLDN14), transcript variant 2, mRNA.                                             |
| 0,035868233 | 1,856585659 | LOC100131061 | PREDICTED: Homo sapiens similar to golgi autoantigen, golgin subfamily a, 2 (LOC100131061), partial mRNA. |
| 0,043421649 | 1,847622265 | LOC100130171 | PREDICTED: Homo sapiens misc_RNA (LOC100130171), miscRNA.                                                 |
| 0,021294015 | 1,838734826 | DDX60L       | Homo sapiens DEAD (Asp-Glu-Ala-Asp) box polypeptide 60-like (DDX60L), mRNA.                               |
| 0,034051965 | 1,836721523 | HS.566643    | UI-H-BI1-ach-b-04-0-UI.s1 NCI_CGAP_Sub3 Homo sapiens cDNA clone IMAGE:2714071 3, mRNA sequence            |
| 0,037867764 | 1,826384142 | C3ORF62      | Homo sapiens chromosome 3 open reading frame 62 (C3orf62), mRNA.                                          |
| 0,023843487 | 1,816765789 | CNGA1        | Homo sapiens cyclic nucleotide gated channel alpha 1 (CNGA1), mRNA.                                       |

|             |             |              |                                                                                                                       |
|-------------|-------------|--------------|-----------------------------------------------------------------------------------------------------------------------|
| 0,000928762 | 1,805709906 | SASS6        | Homo sapiens spindle assembly 6 homolog (C. elegans) (SASS6), mRNA.                                                   |
| 0,012396215 | 1,8042362   | TRIM17       | Homo sapiens tripartite motif-containing 17 (TRIM17), transcript variant 1, mRNA.                                     |
| 0,01560671  | 1,793841028 | LOC642017    | PREDICTED: Homo sapiens hypothetical protein LOC642017 (LOC642017), mRNA.                                             |
| 0,039250065 | 1,793100568 | ZNF669       | Homo sapiens zinc finger protein 669 (ZNF669), mRNA.                                                                  |
| 0,007000537 | 1,788862928 | FLJ45337     | Homo sapiens FLJ45337 protein (FLJ45337), mRNA.                                                                       |
| 0,011711683 | 1,783775324 | HLA-A        | Homo sapiens major histocompatibility complex, class I, A (HLA-A), mRNA.                                              |
| 0,015510828 | 1,781369995 | SPRR3        | Homo sapiens small proline-rich protein 3 (SPRR3), transcript variant 1, mRNA.                                        |
| 0,023129457 | 1,779119497 | LOC642636    | Homo sapiens RAD21 homolog-like (LOC642636), mRNA.                                                                    |
| 0,027354797 | 1,771773722 | LOC100133916 | PREDICTED: Homo sapiens hypothetical protein LOC100133916 (LOC100133916), mRNA.                                       |
| 0,016705661 | 1,765490259 | MYO1G        | Homo sapiens myosin IG (MYO1G), mRNA.                                                                                 |
| 0,017382641 | 1,758593441 | HS.133410    | AU252491 human favorable neuroblastoma cDNA<br>Homo sapiens cDNA clone Nbla00182 3, mRNA sequence                     |
| 0,022651773 | 1,75473613  | ABTB2        | Homo sapiens ankyrin repeat and BTB (POZ) domain containing 2 (ABTB2), mRNA.                                          |
| 0,007338933 | 1,748462286 | MAPK8IP2     | Homo sapiens mitogen-activated protein kinase 8 interacting protein 2 (MAPK8IP2), transcript variant 2, mRNA.         |
| 0,038560235 | 1,742558327 | ZNF136       | PREDICTED: Homo sapiens zinc finger protein 136 (ZNF136), mRNA.                                                       |
| 0,010409998 | 1,737718061 | TNFRSF6B     | Homo sapiens tumor necrosis factor receptor superfamily, member 6b, decoy (TNFRSF6B), transcript variant M68C, mRNA.  |
| 0,003971285 | 1,725065461 | LOC100134280 | PREDICTED: Homo sapiens misc_RNA (LOC100134280), miscRNA.                                                             |
| 0,043927731 | 1,719400889 | LOC440258    | Homo sapiens similar to p40 (LOC440258), mRNA.                                                                        |
| 0,044533818 | 1,710619711 | WNK1         | Homo sapiens WNK lysine deficient protein kinase 1 (WNK1), mRNA.                                                      |
| 0,002295188 | 1,709889795 | LOC729667    | PREDICTED: Homo sapiens misc_RNA (LOC729667), miscRNA.                                                                |
| 0,013189296 | 1,703818179 | A2ML1        | Homo sapiens alpha-2-macroglobulin-like 1 (A2ML1), mRNA.                                                              |
| 0,013382123 | 1,69740634  | HIST1H2BH    | Homo sapiens histone cluster 1, H2bh (HIST1H2BH), mRNA.                                                               |
| 0,022059994 | 1,694188466 | ALG12        | Homo sapiens asparagine-linked glycosylation 12, alpha-1,6-mannosyltransferase homolog (S. cerevisiae) (ALG12), mRNA. |
| 0,032622389 | 1,686915888 | MIR1289-1    | Homo sapiens microRNA 1289-1 (MIR1289-1), microRNA.                                                                   |
| 0,027179322 | 1,685119551 | CRNN         | Homo sapiens cornulin (CRNN), mRNA.                                                                                   |
| 0,024244435 | 1,682867376 | ALOX15B      | Homo sapiens arachidonate 15-lipoxygenase, type B (ALOX15B), transcript variant b, mRNA.                              |
| 0,048257778 | 1,662337662 | ANO2         | Homo sapiens anoctamin 2 (ANO2), mRNA.                                                                                |
| 0,008561463 | 1,647079804 | PI4KAP2      | Homo sapiens phosphatidylinositol 4-kinase, catalytic, alpha polypeptide pseudogene 2 (PI4KAP2), mRNA.                |
| 0,048137181 | 1,641444313 | HIST1H4K     | Homo sapiens histone cluster 1, H4k (HIST1H4K), mRNA.                                                                 |



|             |             |              |                                                                                                                      |
|-------------|-------------|--------------|----------------------------------------------------------------------------------------------------------------------|
| 0,007562737 | 1,638791594 | HS.363126    | UI-CF-EN1-add-l-13-0-UI.s1 UI-CF-EN1 Homo sapiens cDNA clone UI-CF-EN1-add-l-13-0-UI 3, mRNA sequence                |
| 0,024547127 | 1,636094012 | BEX2         | Homo sapiens brain expressed X-linked 2 (BEX2), mRNA.                                                                |
| 0,049232203 | 1,613900511 | LOC100129076 | PREDICTED: Homo sapiens similar to FP17469 (LOC100129076), mRNA.                                                     |
| 0,022721865 | 1,613619854 | TMPRSS11D    | Homo sapiens transmembrane protease, serine 11D (TMPRSS11D), mRNA.                                                   |
| 0,030023471 | 1,613516746 | CHERP        | Homo sapiens calcium homeostasis endoplasmic reticulum protein (CHERP), mRNA.                                        |
| 0,028399537 | 1,604695241 | FXYD3        | Homo sapiens FXYD domain containing ion transport regulator 3 (FXYD3), transcript variant 2, mRNA.                   |
| 0,017368191 | 1,602888624 | LOC649044    | PREDICTED: Homo sapiens hypothetical protein LOC649043, transcript variant 2 (LOC649044), mRNA.                      |
| 0,013562793 | 1,602482759 | LOC728142    | PREDICTED: Homo sapiens hypothetical LOC728142 (LOC728142), mRNA.                                                    |
| 0,012171856 | 1,601551666 | ELF3         | Homo sapiens E74-like factor 3 (ets domain transcription factor, epithelial-specific ) (ELF3), mRNA.                 |
| 0,00949055  | 1,59927467  | LOC146439    | PREDICTED: Homo sapiens hypothetical LOC146439 (LOC146439), mRNA.                                                    |
| 0,026460509 | 1,596320346 | CTSC         | Homo sapiens cathepsin C (CTSC), transcript variant 2, mRNA.                                                         |
| 0,029086602 | 1,595903663 | PHKA1        | Homo sapiens phosphorylase kinase, alpha 1 (muscle) (PHKA1), mRNA.                                                   |
| 0,025174953 | 1,585844429 | AMOTL2       | Homo sapiens angiomin like 2 (AMOTL2), mRNA.                                                                         |
| 0,019306825 | 1,585391633 | DDR1         | Homo sapiens discoidin domain receptor tyrosine kinase 1 (DDR1), transcript variant 2, mRNA.                         |
| 0,043536869 | 1,585203606 | PRIM2        | Homo sapiens primase, DNA, polypeptide 2 (58kDa) (PRIM2), mRNA.                                                      |
| 0,04757957  | 1,579964416 | CHD7         | Homo sapiens chromodomain helicase DNA binding protein 7 (CHD7), mRNA.                                               |
| 0,030733562 | 1,572775993 | NOL3         | Homo sapiens nucleolar protein 3 (apoptosis repressor with CARD domain) (NOL3), mRNA.                                |
| 0,034089162 | 1,569301581 | LOC391044    | PREDICTED: Homo sapiens misc_RNA (LOC391044), miscRNA.                                                               |
| 0,025973475 | 1,558991689 | ALDH3B2      | Homo sapiens aldehyde dehydrogenase 3 family, member B2 (ALDH3B2), transcript variant 2, mRNA.                       |
| 0,018488682 | 1,557531875 | TBX21        | Homo sapiens T-box 21 (TBX21), mRNA.                                                                                 |
| 0,01998202  | 1,554889615 | TNFRSF6B     | Homo sapiens tumor necrosis factor receptor superfamily, member 6b, decoy (TNFRSF6B), transcript variant M68C, mRNA. |
| 0,004096605 | 1,542771954 | C3ORF39      | Homo sapiens chromosome 3 open reading frame 39 (C3orf39), mRNA.                                                     |
| 0,023443237 | 1,53831501  | 37316        | Homo sapiens methionyl-tRNA synthetase 2, mitochondrial (MARS2), nuclear gene encoding mitochondrial protein, mRNA.  |
| 0,046928559 | 1,536957663 | SDHAF1       | Homo sapiens succinate dehydrogenase complex assembly factor 1 (SDHAF1), mRNA.                                       |
| 0,028613323 | 1,532344316 | BARX2        | Homo sapiens BARX homeobox 2 (BARX2), mRNA.                                                                          |
| 0,028471101 | 1,528070833 | PRSS27       | Homo sapiens protease, serine 27 (PRSS27), mRNA.                                                                     |
| 0,03693633  | 1,528009731 | CUL9         | Homo sapiens cullin 9 (CUL9), mRNA.                                                                                  |
| 0,045560501 | 1,523756599 | GSTM4        | Homo sapiens glutathione S-transferase M4 (GSTM4), transcript variant 1, mRNA.                                       |
| 0,001941388 | 1,523493218 | TSEN54       | Homo sapiens tRNA splicing endonuclease 54 homolog (S. cerevisiae) (TSEN54), mRNA.                                   |

|             |              |              |                                                                                                                        |
|-------------|--------------|--------------|------------------------------------------------------------------------------------------------------------------------|
| 0,047903781 | 1,523102384  | NAT1         | PREDICTED: Homo sapiens N-acetyltransferase 1 (arylamine N-acetyltransferase) (NAT1), mRNA.                            |
| 0,020282383 | 1,521781408  | TBC1D3C      | Homo sapiens TBC1 domain family, member 3C (TBC1D3C), mRNA.                                                            |
| 0,01820655  | 1,518273888  | ZNF160       | Homo sapiens zinc finger protein 160 (ZNF160), transcript variant 1, mRNA.                                             |
| 0,029912214 | 1,516987532  | ZNF296       | Homo sapiens zinc finger protein 296 (ZNF296), mRNA.                                                                   |
| 0,021282145 | 1,512260927  | LCLAT1       | Homo sapiens lysocardiolipin acyltransferase 1 (LCLAT1), transcript variant 1, mRNA.                                   |
| 0,000865454 | -1,500554392 | MFAP2        | Homo sapiens microfibrillar-associated protein 2 (MFAP2), transcript variant 2, mRNA.                                  |
| 0,046365574 | -1,506646717 | NFKB2        | Homo sapiens nuclear factor of kappa light polypeptide gene enhancer in B-cells 2 (NFKB2), transcript variant 3, mRNA. |
| 0,037431093 | -1,513012555 | PDE5A        | Homo sapiens phosphodiesterase 5A, cGMP-specific (PDE5A), transcript variant 1, mRNA.                                  |
| 0,010511498 | -1,522543635 | MYADM        | Homo sapiens myeloid-associated differentiation marker (MYADM), transcript variant 2, mRNA.                            |
| 0,035084753 | -1,524819903 | FRS3         | Homo sapiens fibroblast growth factor receptor substrate 3 (FRS3), mRNA.                                               |
| 0,037732097 | -1,530838909 | NLGN2        | Homo sapiens neuroligin 2 (NLGN2), mRNA.                                                                               |
| 0,041056989 | -1,532242279 | HS.552799    | 17000600023745 GRN_PRENEU Homo sapiens cDNA 5, mRNA sequence                                                           |
| 0,024782566 | -1,53779302  | LAMB1        | Homo sapiens laminin, beta 1 (LAMB1), mRNA.                                                                            |
| 0,043776016 | -1,543278639 | PLA2R1       | Homo sapiens phospholipase A2 receptor 1, 180kDa (PLA2R1), transcript variant 2, mRNA.                                 |
| 0,023106169 | -1,544096781 | MCFD2        | Homo sapiens multiple coagulation factor deficiency 2 (MCFD2), mRNA.                                                   |
| 0,028888745 | -1,550406016 | C1S          | Homo sapiens complement component 1, s subcomponent (C1S), transcript variant 2, mRNA.                                 |
| 0,040444109 | -1,552045376 | COL6A3       | Homo sapiens collagen, type VI, alpha 3 (COL6A3), transcript variant 3, mRNA.                                          |
| 0,021974132 | -1,556009601 | RGS4         | Homo sapiens regulator of G-protein signalling 4 (RGS4), mRNA.                                                         |
| 0,042695142 | -1,55651419  | HS.370359    | Homo sapiens mRNA; cDNA DKFZp686F09166 (from clone DKFZp686F09166)                                                     |
| 0,022621603 | -1,556788601 | LSS          | Homo sapiens lanosterol synthase (2,3-oxidosqualene-lanosterol cyclase) (LSS), transcript variant 1, mRNA.             |
| 0,023904218 | -1,558713674 | PFAS         | Homo sapiens phosphoribosylformylglycinamide synthase (FGAR amidotransferase) (PFAS), mRNA.                            |
| 0,03144416  | -1,561329485 | PAPPA        | Homo sapiens pregnancy-associated plasma protein A, pappalysin 1 (PAPPA), mRNA.                                        |
| 0,012251819 | -1,561581744 | ENPEP        | Homo sapiens glutamyl aminopeptidase (aminopeptidase A) (ENPEP), mRNA.                                                 |
| 0,011426397 | -1,5649169   | DCAF16       | Homo sapiens DDB1 and CUL4 associated factor 16 (DCAF16), mRNA.                                                        |
| 0,018599003 | -1,567293681 | RRM2B        | Homo sapiens ribonucleotide reductase M2 B (TP53 inducible) (RRM2B), mRNA.                                             |
| 0,04287536  | -1,567878888 | LOC100128598 | PREDICTED: Homo sapiens hypothetical LOC100128598 (LOC100128598), mRNA.                                                |
| 0,015815354 | -1,568199698 | SPHK1        | Homo sapiens sphingosine kinase 1 (SPHK1), transcript variant 1, mRNA.                                                 |
| 0,021398152 | -1,575567613 | TNC          | Homo sapiens tenascin C (TNC), mRNA.                                                                                   |
| 0,025985193 | -1,575956632 | TSPAN9       | Homo sapiens tetraspanin 9 (TSPAN9), mRNA.                                                                             |
| 0,042446308 | -1,576658596 | ING3         | Homo sapiens inhibitor of growth family, member 3 (ING3), transcript variant 3, mRNA.                                  |



|             |              |           |                                                                                                                                |
|-------------|--------------|-----------|--------------------------------------------------------------------------------------------------------------------------------|
| 0,027994406 | -1,582071132 | LOC653778 | PREDICTED: Homo sapiens similar to solute carrier family 25, member 37 (LOC653778), mRNA.                                      |
| 0,022128668 | -1,583296139 | HN1L      | Homo sapiens hematological and neurological expressed 1-like (HN1L), mRNA.                                                     |
| 0,039305062 | -1,587784131 | C2ORF37   | Homo sapiens chromosome 2 open reading frame 37 (C2orf37), mRNA.                                                               |
| 0,013399131 | -1,589190204 | SH3PXD2B  | Homo sapiens SH3 and PX domains 2B (SH3PXD2B), mRNA.                                                                           |
| 0,026967478 | -1,591102839 | NFIX      | Homo sapiens nuclear factor I/X (CCAAT-binding transcription factor) (NFIX), mRNA.                                             |
| 0,030486631 | -1,59149637  | LMCD1     | Homo sapiens LIM and cysteine-rich domains 1 (LMCD1), mRNA.                                                                    |
| 0,047049542 | -1,593941159 | EIF5      | Homo sapiens eukaryotic translation initiation factor 5 (EIF5), transcript variant 1, mRNA.                                    |
| 0,029078229 | -1,597093791 | LOC648926 | PREDICTED: Homo sapiens similar to Melanoma-associated antigen 1 (MAGE-1 antigen) (Antigen MZ2-E), mRNA.                       |
| 0,004447298 | -1,597265063 | XKR8      | Homo sapiens XK, Kell blood group complex subunit-related family, member 8 (XKR8), mRNA.                                       |
| 0,011666885 | -1,602867106 | NEDD1     | Homo sapiens neural precursor cell expressed, developmentally down-regulated 1 (NEDD1), mRNA.                                  |
| 0,006425255 | -1,606386824 | LOC728643 | Homo sapiens heterogeneous nuclear ribonucleoprotein A1 pseudogene (LOC728643), non-coding RNA.                                |
| 0,039836674 | -1,607410995 | ZWILCH    | Homo sapiens Zwilch, kinetochore associated, homolog (Drosophila) (ZWILCH), transcript variant 1, mRNA.                        |
| 0,044056564 | -1,608904954 | RAB11FIP2 | Homo sapiens RAB11 family interacting protein 2 (class I) (RAB11FIP2), mRNA.                                                   |
| 0,044796736 | -1,609602625 | RSPO3     | Homo sapiens R-spondin 3 homolog (Xenopus laevis) (RSPO3), mRNA.                                                               |
| 0,036562416 | -1,611100867 | ZNF697    | Homo sapiens zinc finger protein 697 (ZNF697), mRNA.                                                                           |
| 0,011589789 | -1,613250433 | LTBP2     | Homo sapiens latent transforming growth factor beta binding protein 2 (LTBP2), mRNA.                                           |
| 0,029288867 | -1,614885331 | HS.485155 | Homo sapiens cDNA: FLJ22515 fis, clone HRC12122, highly similar to AF052101 Homo sapiens clone 23872 mRNA sequence             |
| 0,027276595 | -1,620520888 | LOC284276 | Homo sapiens hypothetical LOC284276 (LOC284276), non-coding RNA.                                                               |
| 0,04233991  | -1,62488952  | ROR2      | Homo sapiens receptor tyrosine kinase-like orphan receptor 2 (ROR2), mRNA.                                                     |
| 0,024997559 | -1,624907103 | PPFIA1    | Homo sapiens protein tyrosine phosphatase, receptor type, f polypeptide, interacting protein (liprin), alpha 1 (PPFIA1), mRNA. |
| 0,032007146 | -1,627250137 | HTRA1     | Homo sapiens HtrA serine peptidase 1 (HTRA1), mRNA.                                                                            |
| 0,01764842  | -1,62918895  | LAMA2     | Homo sapiens laminin, alpha 2 (LAMA2), transcript variant 1, mRNA.                                                             |
| 0,012992749 | -1,631327282 | FAP       | Homo sapiens fibroblast activation protein, alpha (FAP), mRNA.                                                                 |
| 0,030423334 | -1,639083744 | SPINK6    | Homo sapiens serine peptidase inhibitor, Kazal type 6 (SPINK6), mRNA.                                                          |
| 0,017048316 | -1,645023743 | HMGB3     | Homo sapiens high-mobility group box 3 (HMGB3), mRNA.                                                                          |
| 0,015048663 | -1,647594804 | GAS1      | Homo sapiens growth arrest-specific 1 (GAS1), mRNA.                                                                            |
| 0,040279266 | -1,655395032 | AKAP12    | Homo sapiens A kinase (PKA) anchor protein (gravin) 12 (AKAP12), transcript variant 2, mRNA.                                   |

|             |              |              |                                                                                                           |
|-------------|--------------|--------------|-----------------------------------------------------------------------------------------------------------|
| 0,017158145 | -1,659814815 | PTPRQ        | PREDICTED: Homo sapiens protein tyrosine phosphatase, receptor type, Q (PTPRQ), mRNA.                     |
| 0,042006611 | -1,670037927 | COL1A2       | Homo sapiens collagen, type I, alpha 2 (COL1A2), mRNA.                                                    |
| 0,046465516 | -1,672537069 | EGFL6        | Homo sapiens EGF-like-domain, multiple 6 (EGFL6), mRNA.                                                   |
| 0,033801048 | -1,673185834 | GREM1        | Homo sapiens gremlin 1, cysteine knot superfamily, homolog (Xenopus laevis) (GREM1), mRNA.                |
| 0,037952968 | -1,678830454 | C14ORF149    | Homo sapiens chromosome 14 open reading frame 149 (C14orf149), mRNA.                                      |
| 0,018194953 | -1,680170798 | AADAT        | Homo sapiens aminoadipate aminotransferase (AADAT), transcript variant 2, mRNA.                           |
| 0,023603587 | -1,681816909 | CXCR7        | Homo sapiens chemokine (C-X-C motif) receptor 7 (CXCR7), mRNA.                                            |
| 0,023760616 | -1,697084818 | IL1R1        | Homo sapiens interleukin 1 receptor, type I (IL1R1), mRNA.                                                |
| 0,048340855 | -1,699482322 | DIS3L        | Homo sapiens DIS3 mitotic control homolog (S. cerevisiae)-like (DIS3L), mRNA.                             |
| 0,044645054 | -1,706681874 | PTPN23       | Homo sapiens protein tyrosine phosphatase, non-receptor type 23 (PTPN23), mRNA.                           |
| 0,039092378 | -1,715155028 | HS.565708    | wt23e07.x1 NCI_CGAP_Ut1 Homo sapiens cDNA clone IMAGE:2508324 3, mRNA sequence                            |
| 0,018917463 | -1,715828777 | LOC646836    | PREDICTED: Homo sapiens uncharacterized protein LOC646836-like (LOC646836), mRNA.                         |
| 0,0375156   | -1,718470074 | TACSTD1      | Homo sapiens tumor-associated calcium signal transducer 1 (TACSTD1), mRNA.                                |
| 0,008732088 | -1,723528906 | CFH          | Homo sapiens complement factor H (CFH), transcript variant 2, mRNA.                                       |
| 0,031642632 | -1,725278634 | KIAA1430     | Homo sapiens KIAA1430 (KIAA1430), mRNA.                                                                   |
| 0,031627403 | -1,72967265  | TBC1D24      | Homo sapiens TBC1 domain family, member 24 (TBC1D24), mRNA. XM_945422                                     |
| 0,001113982 | -1,734303391 | CASP3        | Homo sapiens caspase 3, apoptosis-related cysteine peptidase (CASP3), transcript variant alpha, mRNA.     |
| 0,013791302 | -1,734950748 | CPXM1        | Homo sapiens carboxypeptidase X (M14 family), member 1 (CPXM1), mRNA.                                     |
| 0,036335044 | -1,737315993 | CCL28        | Homo sapiens chemokine (C-C motif) ligand 28 (CCL28), mRNA.                                               |
| 0,014618543 | -1,738239633 | LOC650254    | PREDICTED: Homo sapiens similar to hypothetical protein FLJ40722, transcript variant 1 (LOC650254), mRNA. |
| 0,022942561 | -1,743331285 | CXCR7        | Homo sapiens chemokine (C-X-C motif) receptor 7 (CXCR7), transcript variant 1, mRNA.                      |
| 0,046128368 | -1,744583354 | FKBP10       | Homo sapiens FK506 binding protein 10, 65 kDa (FKBP10), mRNA.                                             |
| 0,04940476  | -1,75060048  | NRM          | Homo sapiens nurim (nuclear envelope membrane protein) (NRM), mRNA.                                       |
| 0,035104065 | -1,755019373 | LRP12        | Homo sapiens low density lipoprotein-related protein 12 (LRP12), mRNA.                                    |
| 0,032199766 | -1,766812302 | NCOA1        | Homo sapiens nuclear receptor coactivator 1 (NCOA1), transcript variant 2, mRNA.                          |
| 0,022624603 | -1,776046114 | TEX9         | Homo sapiens testis expressed 9 (TEX9), mRNA.                                                             |
| 0,04124649  | -1,776945349 | GREM1        | Homo sapiens gremlin 1, cysteine knot superfamily, homolog (Xenopus laevis) (GREM1), mRNA.                |
| 0,013623605 | -1,77782411  | TNC          | Homo sapiens tenascin C (hexabrachion) (TNC), mRNA.                                                       |
| 0,028985832 | -1,786407767 | LOC100133800 | PREDICTED: Homo sapiens misc_RNA (LOC100133800), miscRNA.                                                 |
| 0,049107994 | -1,786758415 | VCAN         | Homo sapiens versican (VCAN), mRNA.                                                                       |

|             |              |           |                                                                                                            |
|-------------|--------------|-----------|------------------------------------------------------------------------------------------------------------|
| 0,029208365 | -1,789647982 | GPBP1     | Homo sapiens GC-rich promoter binding protein 1 (GPBP1), mRNA.                                             |
| 0,038151358 | -1,804506993 | C16ORF30  | Homo sapiens chromosome 16 open reading frame 30 (C16orf30), mRNA.                                         |
| 0,017575223 | -1,808102131 | KDEL1     | Homo sapiens KDEL (Lys-Asp-Glu-Leu) containing 1 (KDEL1), mRNA.                                            |
| 0,046477887 | -1,814147742 | LOC731751 | PREDICTED: Homo sapiens similar to protein kinase, DNA-activated, catalytic polypeptide (LOC731751), mRNA. |
| 0,045256096 | -1,819725141 | EGLN3     | Homo sapiens egl nine homolog 3 (C. elegans) (EGLN3), mRNA.                                                |
| 0,025445132 | -1,820132013 | RNY1      | Homo sapiens RNA, Ro-associated Y1 (RNY1), small cytoplasmic RNA.                                          |
| 0,017308343 | -1,842503854 | EPCAM     | Homo sapiens epithelial cell adhesion molecule (EPCAM), mRNA.                                              |
| 0,027609652 | -1,84656475  | COL1A2    | Homo sapiens collagen, type I, alpha 2 (COL1A2), mRNA.                                                     |
| 0,020016637 | -1,848446011 | PRM3      | PREDICTED: Homo sapiens protamine 3 (PRM3), mRNA.                                                          |
| 0,025147216 | -1,856201769 | NLGN4Y    | Homo sapiens neuroligin 4, Y-linked (NLGN4Y), mRNA.                                                        |
| 0,020838747 | -1,862304826 | FKBP14    | Homo sapiens FK506 binding protein 14, 22 kDa (FKBP14), mRNA.                                              |
| 0,031014053 | -1,881914449 | SALL2     | Homo sapiens sal-like 2 (Drosophila) (SALL2), mRNA.                                                        |
| 0,010228199 | -1,888962472 | FAM134B   | Homo sapiens family with sequence similarity 134, member B (FAM134B), transcript variant 1, mRNA.          |
| 0,032010719 | -1,896619343 | HS.536748 | PT2.1_10_D05.r.tumor2 Homo sapiens cDNA 3, mRNA sequence                                                   |
| 0,018192016 | -1,899409261 | ANTXR1    | Homo sapiens anthrax toxin receptor 1 (ANTXR1), transcript variant 1, mRNA.                                |
| 0,009631708 | -1,899766436 | FRMD4A    | Homo sapiens FERM domain containing 4A (FRMD4A), mRNA.                                                     |
| 0,019750784 | -1,908981506 | GPC4      | Homo sapiens glypican 4 (GPC4), mRNA.                                                                      |
| 0,036147963 | -1,909291339 | ZIK1      | Homo sapiens zinc finger protein interacting with K protein 1 homolog (mouse) (ZIK1), mRNA.                |
| 0,014726546 | -1,912619539 | WNT5A     | Homo sapiens wingless-type MMTV integration site family, member 5A (WNT5A), mRNA.                          |
| 0,010004987 | -1,913290284 | COL4A1    | Homo sapiens collagen, type IV, alpha 1 (COL4A1), mRNA.                                                    |
| 0,008037639 | -1,935809064 | ZFX       | Homo sapiens zinc finger protein, X-linked (ZFX), mRNA.                                                    |
| 0,03931486  | -1,938360451 | RPGR      | Homo sapiens retinitis pigmentosa GTPase regulator (RPGR), transcript variant B, mRNA.                     |
| 0,025901921 | -1,938514033 | HEPH      | Homo sapiens hephaestin (HEPH), transcript variant 1, mRNA.                                                |
| 0,012520542 | -1,944522968 | HS.149244 | DB336496 TESTI2 Homo sapiens cDNA clone TESTI2007437 3, mRNA sequence                                      |
| 0,024496844 | -1,949480534 | TBX15     | Homo sapiens T-box 15 (TBX15), mRNA.                                                                       |
| 0,016989779 | -1,959738102 | IVD       | Homo sapiens isovaleryl Coenzyme A dehydrogenase (IVD), nuclear gene encoding mitochondrial protein, mRNA. |
| 0,03901996  | -1,961426492 | FMN2      | Homo sapiens formin 2 (FMN2), mRNA.                                                                        |
| 0,018524897 | -1,962424242 | CXORF56   | Homo sapiens chromosome X open reading frame 56 (CXorf56), mRNA.                                           |
| 0,012580762 | -1,96740698  | MGC2752   | Homo sapiens hypothetical protein MGC2752 (MGC2752), mRNA.                                                 |
| 0,02873734  | -1,978933902 | COL3A1    | Homo sapiens collagen, type III, alpha 1 (COL3A1), mRNA.                                                   |

|             |              |              |                                                                                                                  |
|-------------|--------------|--------------|------------------------------------------------------------------------------------------------------------------|
| 0,027053818 | -1,983707865 | PRSS7        | Homo sapiens protease, serine, 7 (enterokinase) (PRSS7), mRNA.                                                   |
| 0,015278193 | -2,005075535 | EGFL6        | Homo sapiens EGF-like-domain, multiple 6 (EGFL6), mRNA.                                                          |
| 0,018143251 | -2,027079304 | NKIRAS2      | Homo sapiens NFKB inhibitor interacting Ras-like 2 (NKIRAS2), transcript variant 2, mRNA.                        |
| 0,005500172 | -2,051504675 | LOC100128892 | PREDICTED: Homo sapiens hypothetical protein LOC100128892 (LOC100128892), mRNA.                                  |
| 0,042459612 | -2,053263096 | CABIN1       | Homo sapiens calcineurin binding protein 1 (CABIN1), mRNA.                                                       |
| 0,007259572 | -2,057457694 | HLX          | Homo sapiens H2.0-like homeobox (HLX), mRNA.                                                                     |
| 0,049908344 | -2,078077314 | HS.473191    | Homo sapiens cDNA FLJ34428 fis, clone HLUNG2000761                                                               |
| 0,001126789 | -2,084441736 | FMOD         | Homo sapiens fibromodulin (FMOD), mRNA.                                                                          |
| 0,024787688 | -2,105068638 | HMGXB4       | Homo sapiens HMG box domain containing 4 (HMGXB4), transcript variant 2, mRNA.                                   |
| 0,013370122 | -2,11395585  | PDGFD        | Homo sapiens platelet derived growth factor D (PDGFD), transcript variant 1, mRNA.                               |
| 0,023622289 | -2,146330029 | C19ORF44     | Homo sapiens chromosome 19 open reading frame 44 (C19orf44), mRNA.                                               |
| 0,014922741 | -2,150510204 | NACC1        | Homo sapiens nucleus accumbens associated 1, BEN and BTB (POZ) domain containing (NACC1), mRNA.                  |
| 0,025488193 | -2,163904236 | LAT1-3TM     | PREDICTED: Homo sapiens SLC7A5 pseudogene, transcript variant 2 (LAT1-3TM), misc RNA.                            |
| 0,006722337 | -2,176198257 | HGD          | Homo sapiens homogentisate 1,2-dioxygenase (homogentisate oxidase) (HGD), mRNA.                                  |
| 0,02720169  | -2,203038674 | MESDC2       | Homo sapiens mesoderm development candidate 2 (MESDC2), mRNA.                                                    |
| 0,027759586 | -2,214120816 | LOC648682    | PREDICTED: Homo sapiens hypothetical protein LOC648682 (LOC648682), mRNA.                                        |
| 0,025664771 | -2,22014589  | LOC100129034 | PREDICTED: Homo sapiens hypothetical protein LOC100129034 (LOC100129034), mRNA.                                  |
| 0,047487791 | -2,221780467 | FAM174B      | Homo sapiens family with sequence similarity 174, member B (FAM174B), mRNA.                                      |
| 0,001771974 | -2,22211278  | GALK2        | Homo sapiens galactokinase 2 (GALK2), transcript variant 2, mRNA.                                                |
| 0,039022708 | -2,225469729 | LOC100131460 | PREDICTED: Homo sapiens misc_RNA (LOC100131460), miscRNA.                                                        |
| 0,010945311 | -2,230033947 | GALNT5       | Homo sapiens UDP-N-acetyl-alpha-D-galactosamine:polypeptide N-acetylgalactosaminyltransferase 5 (GALNT5), mRNA.  |
| 0,005005236 | -2,231603635 | ZBTB8A       | Homo sapiens zinc finger and BTB domain containing 8A (ZBTB8A), mRNA. XM_945039                                  |
| 0,046666472 | -2,235697019 | ZNF670       | Homo sapiens zinc finger protein 670 (ZNF670), mRNA.                                                             |
| 0,0086346   | -2,236828901 | GUCA1A       | Homo sapiens guanylate cyclase activator 1A (retina) (GUCA1A), mRNA.                                             |
| 0,012289769 | -2,246406959 | ZNF717       | PREDICTED: Homo sapiens zinc finger protein 717, transcript variant 3 (ZNF717), mRNA.                            |
| 0,026358916 | -2,262060228 | LRRN3        | Homo sapiens leucine rich repeat neuronal 3 (LRRN3), transcript variant 1, mRNA.                                 |
| 0,003121877 | -2,280974417 | COL15A1      | Homo sapiens collagen, type XV, alpha 1 (COL15A1), mRNA.                                                         |
| 0,012513059 | -2,282698057 | FAM180A      | Homo sapiens family with sequence similarity 180, member A (FAM180A), mRNA.                                      |
| 0,03855878  | -2,300463042 | PDE4D        | Homo sapiens phosphodiesterase 4D, cAMP-specific (phosphodiesterase E3 dunce homolog, Drosophila) (PDE4D), mRNA. |

|             |              |              |                                                                                                                   |
|-------------|--------------|--------------|-------------------------------------------------------------------------------------------------------------------|
| 0,036289212 | -2,305019305 | LOC91664     | PREDICTED: Homo sapiens hypothetical protein BC007307 (LOC91664), mRNA.                                           |
| 0,047544516 | -2,320614999 | CRISPLD2     | Homo sapiens cysteine-rich secretory protein LCCL domain containing 2 (CRISPLD2), mRNA.                           |
| 0,021331301 | -2,367304166 | LOC649143    | PREDICTED: Homo sapiens similar to HLA class II antigen, DRB1-9 beta chain precursor, transcript variant 2, mRNA. |
| 0,017520874 | -2,389855515 | MMP7         | Homo sapiens matrix metalloproteinase 7 (matrilysin, uterine) (MMP7), mRNA.                                       |
| 0,018076071 | -2,410546875 | THUMPD3      | Homo sapiens THUMP domain containing 3 (THUMPD3), mRNA.                                                           |
| 0,024192524 | -2,421915444 | WISP1        | Homo sapiens WNT1 inducible signaling pathway protein 1 (WISP1), transcript variant 1, mRNA.                      |
| 0,007657331 | -2,439589835 | LOC100130233 | PREDICTED: Homo sapiens misc_RNA (LOC100130233), miscRNA.                                                         |
| 0,017908442 | -2,449850299 | FAM161A      | Homo sapiens family with sequence similarity 161, member A (FAM161A), mRNA.                                       |
| 0,033672273 | -2,458472264 | NDP          | Homo sapiens Norrie disease (pseudoglioma) (NDP), mRNA.                                                           |
| 0,042823069 | -2,477111113 | COL11A1      | Homo sapiens collagen, type XI, alpha 1 (COL11A1), transcript variant A, mRNA.                                    |
| 0,040397325 | -2,479292267 | GAGE2B       | Homo sapiens G antigen 2B (GAGE2B), mRNA.                                                                         |
| 0,038846363 | -2,487122558 | UBTFL2       | Homo sapiens upstream binding transcription factor, RNA polymerase I-like 2 (UBTFL2), mRNA.                       |
| 0,044408455 | -2,502857143 | C17ORF69     | Homo sapiens chromosome 17 open reading frame 69 (C17orf69), mRNA.                                                |
| 0,017365386 | -2,544186491 | SPON1        | Homo sapiens spondin 1, extracellular matrix protein (SPON1), mRNA.                                               |
| 0,006886124 | -2,559573192 | COL18A1      | Homo sapiens collagen, type XVIII, alpha 1 (COL18A1), transcript variant 2, mRNA.                                 |
| 0,036510023 | -2,590545273 | NSUN5C       | Homo sapiens NOP2/Sun domain family, member 5C (NSUN5C), transcript variant 1, mRNA.                              |
| 0,047182759 | -2,618362283 | MYO16        | Homo sapiens myosin XVI (MYO16), mRNA.                                                                            |
| 0,015418238 | -2,650049405 | FNDC1        | Homo sapiens fibronectin type III domain containing 1 (FNDC1), mRNA.                                              |
| 0,026763779 | -2,657708628 | TDRD3        | Homo sapiens tudor domain containing 3 (TDRD3), mRNA.                                                             |
| 0,004605098 | -2,690970235 | FNDC1        | Homo sapiens fibronectin type III domain containing 1 (FNDC1), mRNA.                                              |
| 0,032297812 | -2,720467836 | N4BP2L2      | Homo sapiens NEDD4 binding protein 2-like 2 (N4BP2L2), transcript variant 2, mRNA.                                |
| 0,002029508 | -2,732681018 | LOC645961    | PREDICTED: Homo sapiens similar to chromosome 9 open reading frame 36 (LOC645961), mRNA.                          |
| 0,030951502 | -2,746730293 | C6ORF188     | Homo sapiens chromosome 6 open reading frame 188 (C6orf188), mRNA.                                                |
| 0,022107195 | -2,755512573 | HS.562504    | PM3-DT0037-231299-001-e06 DT0037 Homo sapiens cDNA, mRNA sequence                                                 |
| 0,021538103 | -2,765463918 | LOC645289    | PREDICTED: Homo sapiens similar to CG33096-PA, isoform A (LOC645289), mRNA.                                       |
| 0,046151969 | -2,765614939 | TAF5         | Homo sapiens TAF5 RNA polymerase II, TATA box binding protein (TBP)-associated factor, 100kDa (TAF5), mRNA.       |
| 0,037119079 | -2,88490364  | MIR1277      | Homo sapiens microRNA 1277 (MIR1277), microRNA.                                                                   |
| 0,011599899 | -2,951431493 | SLC29A3      | Homo sapiens solute carrier family 29 (nucleoside transporters), member 3 (SLC29A3), mRNA.                        |
| 0,048708047 | -3,013750622 | LAMC3        | Homo sapiens laminin, gamma 3 (LAMC3), mRNA.                                                                      |

|             |              |           |                                                                                                            |
|-------------|--------------|-----------|------------------------------------------------------------------------------------------------------------|
| 0,031225207 | -3,032654006 | TP53I11   | Homo sapiens tumor protein p53 inducible protein 11 (TP53I11), mRNA.                                       |
| 0,028868568 | -3,053271569 | SERTAD4   | Homo sapiens SERTA domain containing 4 (SERTAD4), mRNA.                                                    |
| 0,041430408 | -3,092132083 | SPPL2B    | Homo sapiens signal peptide peptidase-like 2B (SPPL2B), transcript variant 3, mRNA.                        |
| 0,028882438 | -3,166746102 | HIC1      | Homo sapiens hypermethylated in cancer 1 (HIC1), transcript variant 2, mRNA.                               |
| 0,03196312  | -3,211204513 | CYP19A1   | Homo sapiens cytochrome P450, family 19, subfamily A, polypeptide 1 (CYP19A1), transcript variant 1, mRNA. |
| 0,011263292 | -3,255533199 | TRIM46    | Homo sapiens tripartite motif-containing 46 (TRIM46), mRNA.                                                |
| 0,005122409 | -3,265701392 | MRPL55    | Homo sapiens mitochondrial ribosomal protein L55 (MRPL55), transcript variant 4, mRNA.                     |
| 0,022141482 | -3,277754678 | ENTPD1    | Homo sapiens ectonucleoside triphosphate diphosphohydrolase 1 (ENTPD1), transcript variant 2, mRNA.        |
| 0,039835959 | -3,391727738 | FOXL2     | PREDICTED: Homo sapiens forkhead box L2 (FOXL2), mRNA.                                                     |
| 0,018271571 | -3,394011032 | FAM13A    | Homo sapiens family with sequence similarity 13, member A (FAM13A), transcript variant 1, mRNA.            |
| 0,004866202 | -3,403044341 | LOC90499  | PREDICTED: Homo sapiens misc_RNA (LOC90499), miscRNA.                                                      |
| 0,018028498 | -3,496420048 | LOC728832 | PREDICTED: Homo sapiens hypothetical protein LOC728832 (LOC728832), mRNA.                                  |
| 0,034956901 | -3,590531967 | SCCPDH    | Homo sapiens saccharopine dehydrogenase (putative) (SCCPDH), mRNA.                                         |
| 0,007206988 | -3,616140351 | LOC643854 | PREDICTED: Homo sapiens misc_RNA (LOC643854), miscRNA.                                                     |
| 0,045951573 | -3,627788259 | FAM53A    | Homo sapiens family with sequence similarity 53, member A (FAM53A), mRNA.                                  |
| 0,04754708  | -3,636635638 | NLGN4X    | Homo sapiens neuroligin 4, X-linked (NLGN4X), transcript variant 1, mRNA.                                  |
| 0,026845948 | -3,841036031 | LOC401677 | PREDICTED: Homo sapiens similar to eukaryotic translation elongation factor 1 alpha 2 (LOC401677), mRNA.   |
| 0,03069793  | -3,861590674 | PPAPDC1A  | Homo sapiens phosphatidic acid phosphatase type 2 domain containing 1A (PPAPDC1A), mRNA.                   |
| 0,040948255 | -3,911007026 | MYBBP1A   | Homo sapiens MYB binding protein (P160) 1a (MYBBP1A), mRNA.                                                |
| 0,011199847 | -4,04035533  | TSPYL2    | Homo sapiens TSPY-like 2 (TSPYL2), mRNA.                                                                   |
| 0,012192399 | -4,052890529 | TRAF5     | Homo sapiens TNF receptor-associated factor 5 (TRAF5), transcript variant 1, mRNA.                         |
| 0,01040314  | -4,063209076 | PCSK1     | Homo sapiens proprotein convertase subtilisin/kexin type 1 (PCSK1), mRNA.                                  |
| 0,044069124 | -4,094113621 | LOC148766 | PREDICTED: Homo sapiens similar to hCG2045075 (LOC148766), mRNA.                                           |
| 0,016513965 | -4,35370228  | LRRN3     | Homo sapiens leucine rich repeat neuronal 3 (LRRN3), mRNA.                                                 |
| 0,049308774 | -4,550935399 | SNORA29   | Homo sapiens small nucleolar RNA, H/ACA box 29 (SNORA29), small nucleolar RNA.                             |
| 0,021304961 | -4,709918676 | RAD51L1   | Homo sapiens RAD51-like 1 (S. cerevisiae) (RAD51L1), transcript variant 1, mRNA.                           |
| 0,02327271  | -5,130451713 | LGR4      | Homo sapiens leucine-rich repeat-containing G protein-coupled receptor 4 (LGR4), mRNA.                     |
| 0,016957479 | -5,237949969 | SLC44A4   | Homo sapiens solute carrier family 44, member 4 (SLC44A4), mRNA.                                           |



|             |              |           |                                                                                                                    |
|-------------|--------------|-----------|--------------------------------------------------------------------------------------------------------------------|
| 0,005631342 | -5,611572266 | HS.536125 | CR744726 Homo sapiens library (Ebert L) Homo sapiens cDNA clone IMAGp971O08109 ; IMAGE:378163, mRNA sequence       |
| 0,022556444 | -5,710137276 | ZSCAN29   | Homo sapiens zinc finger and SCAN domain containing 29 (ZSCAN29), mRNA.                                            |
| 0,011796891 | -5,978118449 | ORC4L     | Homo sapiens origin recognition complex, subunit 4-like (yeast) (ORC4L), transcript variant 3, mRNA.               |
| 0,018542228 | -6,334700254 | LOC650815 | PREDICTED: Homo sapiens similar to T-cell receptor alpha chain V region CTL-L17 precursor (LOC650815), mRNA.       |
| 0,038295426 | -6,340566714 | MYOZ3     | Homo sapiens myozenin 3 (MYOZ3), mRNA.                                                                             |
| 0,032128855 | -6,35605407  | LOC652455 | PREDICTED: Homo sapiens similar to Transcriptional regulator ATRX (ATP-dependent helicase ATRX) , mRNA.            |
| 0,004012056 | -10,18348624 | GCK       | Homo sapiens glucokinase (hexokinase 4, maturity onset diabetes of the young 2) (GCK), transcript variant 1, mRNA. |
| 0,001498917 | -10,77839217 | CNTNAP5   | Homo sapiens contactin associated protein-like 5 (CNTNAP5), mRNA.                                                  |
| 0,011797152 | -11,73902894 | ANO1      | Homo sapiens anoctamin 1, calcium activated chloride channel (ANO1), transcript variant 1, mRNA.                   |

**Table SII – Part II: genes significantly modulated after treatment 2 (cold-dry)**

| <b>p-value<br/>(Treat-2_vs_CTRL)</b> | <b>Fold change<br/>(Treat-2_vs_CTRL)</b> | <b>Gene Symbol</b> | <b>Description</b>                                                                                           |
|--------------------------------------|------------------------------------------|--------------------|--------------------------------------------------------------------------------------------------------------|
| 0,014793588                          | 92,57434944                              | KRTAP19-1          | Homo sapiens keratin associated protein 19-1 (KRTAP19-1), mRNA.                                              |
| 0,008903671                          | 22,48918373                              | RTN4               | Homo sapiens reticulon 4 (RTN4), transcript variant 3, mRNA.                                                 |
| 0,020714842                          | 10,0546497                               | LCE1E              | Homo sapiens late cornified envelope 1E (LCE1E), mRNA.                                                       |
| 0,038382654                          | 8,59984639                               | HIRA               | Homo sapiens HIR histone cell cycle regulation defective homolog A ( <i>S. cerevisiae</i> ) (HIRA), mRNA.    |
| 0,002892289                          | 6,567208802                              | LOC645401          | PREDICTED: Homo sapiens hypothetical protein LOC645401 (LOC645401), mRNA.                                    |
| 0,043618474                          | 6,486153846                              | CLDN9              | Homo sapiens claudin 9 (CLDN9), mRNA.                                                                        |
| 0,023747944                          | 6,204754187                              | PCDH11X            | Homo sapiens protocadherin 11 X-linked (PCDH11X), transcript variant a, mRNA.                                |
| 0,019851295                          | 5,504091175                              | HS.539177          | qe14g03.x1 Soares_testis_NHT Homo sapiens cDNA clone IMAGE:1738996 3, mRNA sequence                          |
| 0,049346048                          | 4,758954209                              | HS.544460          | RST20417 Athersys RAGE Library Homo sapiens cDNA, mRNA sequence                                              |
| 0,004563128                          | 4,685289184                              | DKFZP451M2119      | Homo sapiens hypothetical protein DKFZp451M2119 (DKFZp451M2119), mRNA.                                       |
| 0,016378683                          | 4,602652464                              | UNC5A              | Homo sapiens unc-5 homolog A ( <i>C. elegans</i> ) (UNC5A), mRNA.                                            |
| 0,006007734                          | 4,320083138                              | LOC646476          | PREDICTED: Homo sapiens misc_RNA (LOC646476), miscRNA.                                                       |
| 0,008553426                          | 4,30460333                               | PIGO               | Homo sapiens phosphatidylinositol glycan anchor biosynthesis, class O (PIGO), transcript variant 1, mRNA.    |
| 0,027886094                          | 4,252558209                              | CXORF59            | Homo sapiens chromosome X open reading frame 59 (CXorf59), mRNA.                                             |
| 0,014317071                          | 4,184196492                              | SCARNA13           | Homo sapiens small Cajal body-specific RNA 13 (SCARNA13), guide RNA.                                         |
| 0,041306068                          | 4,110419121                              | APOC2              | Homo sapiens apolipoprotein C-II (APOC2), mRNA.                                                              |
| 0,022001023                          | 4,029837251                              | HS.576072          | NISC_na09g08.y1 COGENE 8.5 EAT Homo sapiens cDNA clone IMAGE:5794742 5, mRNA sequence                        |
| 0,025246024                          | 3,978660582                              | LOC390748          | Homo sapiens similar to poly(A)binding protein nuclear-like 1 (LOC390748), mRNA.                             |
| 0,0026539                            | 3,955076603                              | ACRV1              | Homo sapiens acrosomal vesicle protein 1 (ACRV1), transcript variant 11, mRNA.                               |
| 0,017206327                          | 3,928662211                              | LCE5A              | Homo sapiens late cornified envelope 5A (LCE5A), mRNA.                                                       |
| 0,038967867                          | 3,800769971                              | LRAT               | Homo sapiens lecithin retinol acyltransferase (phosphatidylcholine--retinol O-acyltransferase) (LRAT), mRNA. |
| 0,005652158                          | 3,794301785                              | C1ORF68            | Homo sapiens chromosome 1 open reading frame 68 (C1orf68), mRNA.                                             |
| 0,000232655                          | 3,769655111                              | LCE1E              | Homo sapiens late cornified envelope 1E (LCE1E), mRNA.                                                       |
| 0,008207814                          | 3,671147526                              | FOS                | Homo sapiens v-fos FBJ murine osteosarcoma viral oncogene homolog (FOS), mRNA.                               |
| 0,042697687                          | 3,658720201                              | FOXO6              | PREDICTED: Homo sapiens forkhead box protein O6 (FOXO6), mRNA.                                               |
| 0,001271516                          | 3,596949289                              | LCE1A              | Homo sapiens late cornified envelope 1A (LCE1A), mRNA.                                                       |
| 0,034550965                          | 3,581376252                              | SFTPD              | Homo sapiens surfactant protein D (SFTPD), mRNA.                                                             |
| 0,000330685                          | 3,568134649                              | IL1F7              | Homo sapiens interleukin 1 family, member 7 (zeta) (IL1F7), transcript variant 4, mRNA.                      |
| 0,02413342                           | 3,539595238                              | SPINK7             | Homo sapiens serine peptidase inhibitor, Kazal type 7 (putative) (SPINK7), mRNA.                             |
| 0,010460711                          | 3,506051437                              | CFHR2              | Homo sapiens complement factor H-related 2 (CFHR2), mRNA.                                                    |

|             |                    |              |                                                                                                         |
|-------------|--------------------|--------------|---------------------------------------------------------------------------------------------------------|
| 0,019797864 | <b>3,490951203</b> | RASSF6       | Homo sapiens Ras association (RalGDS/AF-6) domain family member 6 (RASSF6), transcript variant 1, mRNA. |
| 0,007515439 | <b>3,450304878</b> | C11ORF44     | PREDICTED: Homo sapiens chromosome 11 open reading frame 44 (C11orf44), miscRNA.                        |
| 0,022380296 | <b>3,386683064</b> | PVT1         | Homo sapiens Pvt1 oncogene (non-protein coding) (PVT1), non-coding RNA.                                 |
| 0,002006144 | <b>3,32442894</b>  | LCE1D        | Homo sapiens late cornified envelope 1D (LCE1D), mRNA.                                                  |
| 0,004930971 | <b>3,290259805</b> | LCE1F        | Homo sapiens late cornified envelope 1F (LCE1F), mRNA.                                                  |
| 0,000299939 | <b>3,273687243</b> | IL1F7        | Homo sapiens interleukin 1 family, member 7 (zeta) (IL1F7), transcript variant 1, mRNA.                 |
| 0,010113399 | <b>3,220040796</b> | LOC642812    | PREDICTED: Homo sapiens misc_RNA (LOC642812), miscRNA.                                                  |
| 0,006389168 | <b>3,197620279</b> | HS.444839    | NISC_gj13d12.x1 NCI_CGAP_Pr28 Homo sapiens cDNA clone IMAGE:3271726 3, mRNA sequence                    |
| 0,026880032 | <b>3,149837134</b> | SNORD83B     | Homo sapiens small nucleolar RNA, C/D box 83B (SNORD83B), small nucleolar RNA.                          |
| 0,014051131 | <b>3,145726462</b> | WFDC12       | Homo sapiens WAP four-disulfide core domain 12 (WFDC12), mRNA.                                          |
| 0,009380149 | <b>3,136690829</b> | HS.516420    | PREDICTED: Homo sapiens skin-specific protein (xp33), mRNA                                              |
| 0,002477973 | <b>3,117725334</b> | LCE1B        | Homo sapiens late cornified envelope 1B (LCE1B), mRNA.                                                  |
| 0,027224799 | <b>3,041348673</b> | DIAPH3       | Homo sapiens diaphanous homolog 3 (Drosophila) (DIAPH3), transcript variant 1, mRNA.                    |
| 0,004834843 | <b>3,026978909</b> | LCE6A        | Homo sapiens late cornified envelope 6A (LCE6A), mRNA.                                                  |
| 0,018486468 | <b>2,809620049</b> | MIR1281      | Homo sapiens microRNA 1281 (MIR1281), microRNA.                                                         |
| 0,038138227 | <b>2,787790789</b> | HS.62927     | RST29852 Athersys RAGE Library Homo sapiens cDNA, mRNA sequence                                         |
| 0,015938133 | <b>2,770764954</b> | LCE1C        | Homo sapiens late cornified envelope 1C (LCE1C), mRNA.                                                  |
| 0,039489688 | <b>2,73068529</b>  | LOC100131986 | PREDICTED: Homo sapiens similar to hCG1742852 (LOC100131986), mRNA.                                     |
| 0,047038463 | <b>2,715875371</b> | HS.523235    | nq82a06.s1 NCI_CGAP_Co9 Homo sapiens cDNA clone IMAGE:1158802 3, mRNA sequence                          |
| 0,018452518 | <b>2,67849345</b>  | ZBP1         | Homo sapiens Z-DNA binding protein 1 (ZBP1), mRNA.                                                      |
| 0,021481333 | <b>2,65505618</b>  | LOC649318    | PREDICTED: Homo sapiens hypothetical protein LOC649318 (LOC649318), mRNA.                               |
| 0,043616796 | <b>2,636397833</b> | LOC652736    | PREDICTED: Homo sapiens similar to hydrocephalus inducing (LOC652736), mRNA.                            |
| 0,009965996 | <b>2,595375723</b> | ARHGDI3      | Homo sapiens Rho GDP dissociation inhibitor (GDI) gamma (ARHGDI3), mRNA.                                |
| 0,041384038 | <b>2,594130926</b> | LOC151457    | PREDICTED: Homo sapiens misc_RNA (LOC151457), miscRNA.                                                  |
| 0,003109512 | <b>2,554025558</b> | CXCL10       | Homo sapiens chemokine (C-X-C motif) ligand 10 (CXCL10), mRNA.                                          |
| 0,04273309  | <b>2,540868925</b> | LOC728931    | PREDICTED: Homo sapiens similar to hCG17429 (LOC728931), mRNA.                                          |
| 0,01350683  | <b>2,463503992</b> | LCE2A        | Homo sapiens late cornified envelope 2A (LCE2A), mRNA.                                                  |
| 0,034905178 | <b>2,454351225</b> | CRNN         | Homo sapiens cornulin (CRNN), mRNA.                                                                     |
| 0,040293513 | <b>2,450761851</b> | LOC730060    | PREDICTED: Homo sapiens hypothetical LOC730060 (LOC730060), mRNA.                                       |
| 0,000912311 | <b>2,436187399</b> | LOC643382    | PREDICTED: Homo sapiens hypothetical LOC643382 (LOC643382), mRNA.                                       |
| 0,009615691 | <b>2,408360022</b> | LCE2D        | Homo sapiens late cornified envelope 2D (LCE2D), mRNA.                                                  |
| 0,0030678   | <b>2,381944581</b> | KRT78        | Homo sapiens keratin 78 (KRT78), mRNA.                                                                  |
| 0,031241971 | <b>2,333380561</b> | SNORD104     | Homo sapiens small nucleolar RNA, C/D box 104 (SNORD104), small nucleolar RNA.                          |
| 0,032689425 | <b>2,307374101</b> | LOC100133758 | PREDICTED: Homo sapiens hypothetical LOC100133758 (LOC100133758), partial mRNA.                         |

|             |             |           |                                                                                                                |
|-------------|-------------|-----------|----------------------------------------------------------------------------------------------------------------|
| 0,000403206 | 2,259278636 | ANXA9     | Homo sapiens annexin A9 (ANXA9), mRNA.                                                                         |
| 0,028878342 | 2,257188498 | HIST1H2AE | Homo sapiens histone cluster 1, H2ae (HIST1H2AE), mRNA.                                                        |
| 0,021620059 | 2,245677732 | MCTP1     | Homo sapiens multiple C2 domains, transmembrane 1 (MCTP1), transcript variant L, mRNA.                         |
| 0,024743793 | 2,241530688 | PKD1L2    | Homo sapiens polycystic kidney disease 1-like 2 (PKD1L2), transcript variant 3, mRNA.                          |
| 0,010511723 | 2,236556081 | LCE2C     | Homo sapiens late cornified envelope 2C (LCE2C), mRNA.                                                         |
| 0,019341638 | 2,234367388 | LCE2B     | Homo sapiens late cornified envelope 2B (LCE2B), mRNA.                                                         |
| 0,013102083 | 2,197571822 | SNORA65   | Homo sapiens small nucleolar RNA, H/ACA box 65 (SNORA65), small nucleolar RNA.                                 |
| 0,045477462 | 2,158091908 | LOC401805 | PREDICTED: Homo sapiens misc_RNA (LOC401805), partial miscRNA.                                                 |
| 0,043809226 | 2,140156062 | PCBP2     | Homo sapiens poly(rC) binding protein 2 (PCBP2), transcript variant 6, mRNA.                                   |
| 0,024253501 | 2,123952615 | LOC650898 | PREDICTED: Homo sapiens similar to Hermansky-Pudlak syndrome 1 protein isoform b (LOC650898), mRNA.            |
| 0,006420595 | 2,122497247 | HS.554203 | Homo sapiens clone FP7915 unknown mRNA                                                                         |
| 0,029757273 | 2,121976593 | KLHL29    | PREDICTED: Homo sapiens kelch-like 29 (Drosophila) (KLHL29), mRNA.                                             |
| 0,006218868 | 2,118890996 | ACP5      | Homo sapiens acid phosphatase 5, tartrate resistant (ACP5), mRNA.                                              |
| 0,018772943 | 2,11321365  | HS.442427 | UI-H-EU1-bad-m-18-0-UI.s1 NCI_CGAP_Ct1 Homo sapiens cDNA clone UI-H-EU1-bad-m-18-0-UI 3, mRNA sequence         |
| 0,036061767 | 2,111944966 | PHACTR3   | Homo sapiens phosphatase and actin regulator 3 (PHACTR3), transcript variant 3, mRNA.                          |
| 0,010235679 | 2,104770266 | WDR35     | Homo sapiens WD repeat domain 35 (WDR35), transcript variant 2, mRNA.                                          |
| 0,017971073 | 2,095960711 | LOC643008 | PREDICTED: Homo sapiens PP12104, transcript variant 1 (LOC643008), mRNA.                                       |
| 0,012981155 | 2,086250958 | PGBD2     | Homo sapiens piggyBac transposable element derived 2 (PGBD2), transcript variant 2, mRNA.                      |
| 0,040023586 | 2,073215182 | IFIT3     | Homo sapiens interferon-induced protein with tetratricopeptide repeats 3 (IFIT3), mRNA.                        |
| 0,039838328 | 2,063991323 | LOC649680 | PREDICTED: Homo sapiens hypothetical protein LOC649680 (LOC649680), mRNA.                                      |
| 0,043163516 | 2,052027857 | C8ORF77   | PREDICTED: Homo sapiens chromosome 8 open reading frame 77 (C8orf77), misc RNA.                                |
| 0,01807216  | 2,014026367 | WFDC5     | Homo sapiens WAP four-disulfide core domain 5 (WFDC5), mRNA.                                                   |
| 0,019900956 | 2,00627199  | LOC643733 | PREDICTED: Homo sapiens hypothetical LOC643733 (LOC643733), mRNA.                                              |
| 0,044360405 | 2,000549115 | FAM108B1  | Homo sapiens family with sequence similarity 108, member B1 (FAM108B1), transcript variant 1, mRNA.            |
| 0,004848688 | 2,00040905  | COG5      | Homo sapiens component of oligomeric golgi complex 5 (COG5), transcript variant 1, mRNA.                       |
| 0,041549383 | 1,998582566 | RSAD2     | Homo sapiens radical S-adenosyl methionine domain containing 2 (RSAD2), mRNA.                                  |
| 0,007045764 | 1,986765416 | FAM63A    | Homo sapiens family with sequence similarity 63, member A (FAM63A), transcript variant 1, mRNA.                |
| 0,013313624 | 1,977403294 | KRT126P   | PREDICTED: Homo sapiens keratin 126 pseudogene (KRT126P), mRNA.                                                |
| 0,004450252 | 1,966481229 | SNORD68   | Homo sapiens small nucleolar RNA, C/D box 68 (SNORD68), small nucleolar RNA.                                   |
| 0,01339753  | 1,959036764 | WDR27     | Homo sapiens WD repeat domain 27 (WDR27), mRNA.                                                                |
| 0,041158387 | 1,952245436 | CDKN3     | Homo sapiens cyclin-dependent kinase inhibitor 3 (CDK2-associated dual specificity phosphatase) (CDKN3), mRNA. |

|             |             |              |                                                                                                                          |
|-------------|-------------|--------------|--------------------------------------------------------------------------------------------------------------------------|
| 0,005616863 | 1,947658863 | LOC338667    | PREDICTED: Homo sapiens hypothetical protein LOC338667 (LOC338667), mRNA.                                                |
| 0,040220687 | 1,946813061 | IFIT2        | Homo sapiens interferon-induced protein with tetratricopeptide repeats 2 (IFIT2), mRNA.                                  |
| 0,045702255 | 1,932018174 | SNORA67      | Homo sapiens small nucleolar RNA, H/ACA box 67 (SNORA67), small nucleolar RNA.                                           |
| 0,01576719  | 1,922716489 | CES8         | Homo sapiens carboxylesterase 8 (putative) (CES8), mRNA.                                                                 |
| 0,034629278 | 1,907635116 | C12ORF37     | PREDICTED: Homo sapiens chromosome 12 open reading frame 37 (C12orf37), mRNA.                                            |
| 0,002885271 | 1,889687586 | PHF19        | Homo sapiens PHD finger protein 19 (PHF19), transcript variant 2, mRNA.                                                  |
| 0,03455043  | 1,887172285 | WASH5P       | Homo sapiens WAS protein family homolog 5 pseudogene (WASH5P), non-coding RNA.                                           |
| 0,028230156 | 1,885536428 | LY6D         | Homo sapiens lymphocyte antigen 6 complex, locus D (LY6D), mRNA.                                                         |
| 0,035937156 | 1,878363985 | SNORA6       | Homo sapiens small nucleolar RNA, H/ACA box 6 (SNORA6), small nucleolar RNA.                                             |
| 0,048490111 | 1,877040872 | SNHG9        | Homo sapiens small nucleolar RNA host gene 9 (non-protein coding) (SNHG9), non-coding RNA.                               |
| 0,031064758 | 1,869733026 | TFIP11       | Homo sapiens tuftelin interacting protein 11 (TFIP11), transcript variant 1, mRNA.                                       |
| 0,028851103 | 1,866652854 | FAM25G       | Homo sapiens family with sequence similarity 25, member G (FAM25G), mRNA.                                                |
| 0,03844789  | 1,860251748 | LOC643342    | PREDICTED: Homo sapiens misc_RNA (LOC643342), miscRNA.                                                                   |
| 0,026388889 | 1,852048796 | ZNF536       | Homo sapiens zinc finger protein 536 (ZNF536), mRNA.                                                                     |
| 0,023433001 | 1,84182901  | UPK1A        | Homo sapiens uroplakin 1A (UPK1A), mRNA.                                                                                 |
| 0,024116321 | 1,835204449 | LOC196752    | Homo sapiens similar to CG32542-PA (LOC196752), mRNA.                                                                    |
| 0,005466676 | 1,831075443 | SFRS5        | Homo sapiens splicing factor, arginine/serine-rich 5 (SFRS5), transcript variant 2, mRNA.                                |
| 0,044798728 | 1,828029034 | SSX4         | PREDICTED: Homo sapiens synovial sarcoma, X breakpoint 4, transcript variant 3 (SSX4), mRNA.                             |
| 0,046045684 | 1,825064599 | LOC730254    | PREDICTED: Homo sapiens hypothetical LOC730254 (LOC730254), mRNA.                                                        |
| 0,038336935 | 1,814968658 | WFDC5        | Homo sapiens WAP four-disulfide core domain 5 (WFDC5), mRNA.                                                             |
| 0,011707275 | 1,81270954  | ATF4         | Homo sapiens activating transcription factor 4 (tax-responsive enhancer element B67) (ATF4), transcript variant 1, mRNA. |
| 0,018609261 | 1,80664522  | NBPF14       | Homo sapiens neuroblastoma breakpoint family, member 14 (NBPF14), mRNA.                                                  |
| 0,007378205 | 1,804616991 | GDPD3        | Homo sapiens glycerophosphodiester phosphodiesterase domain containing 3 (GDPD3), mRNA.                                  |
| 0,02392801  | 1,802536462 | HS.541654    | hc86a08.x2 NCI_CGAP_Kid1 Homo sapiens cDNA clone IMAGE:2899574, mRNA sequence                                            |
| 0,019644504 | 1,795233741 | TREX2        | Homo sapiens three prime repair exonuclease 2 (TREX2), mRNA.                                                             |
| 0,035527706 | 1,791896621 | SORD         | PREDICTED: Homo sapiens sorbitol dehydrogenase (SORD), mRNA.                                                             |
| 0,023635865 | 1,787968136 | TMEM191B     | PREDICTED: Homo sapiens transmembrane protein 191B, transcript variant 2 (TMEM191B), mRNA.                               |
| 0,040701561 | 1,787415784 | LOC100130598 | PREDICTED: Homo sapiens hypothetical protein LOC100130598 (LOC100130598), mRNA.                                          |
| 0,006900144 | 1,78386668  | HS.582009    | 602544662F1 NIH_MGC_60 Homo sapiens cDNA clone IMAGE:4667270 5, mRNA sequence                                            |
| 0,035828958 | 1,782610823 | LOC100134002 | PREDICTED: Homo sapiens hypothetical LOC100134002 (LOC100134002), mRNA.                                                  |
| 0,046049932 | 1,78176511  | SFRS12IP1    | Homo sapiens SFRS12-interacting protein 1 (SFRS12IP1), mRNA.                                                             |
| 0,006188097 | 1,779209386 | SFRS5        | Homo sapiens splicing factor, arginine/serine-rich 5 (SFRS5), transcript variant 2, mRNA.                                |

|             |             |           |                                                                                                                            |
|-------------|-------------|-----------|----------------------------------------------------------------------------------------------------------------------------|
| 0,040493769 | 1,776717917 | HS.561307 | wI03f11.x1 NCI_CGAP_Ut1 Homo sapiens cDNA clone IMAGE:2423853 3, mRNA sequence                                             |
| 0,023535591 | 1,775957266 | RHBDL2    | Homo sapiens rhomboid, veinlet-like 2 (Drosophila) (RHBDL2), mRNA.                                                         |
| 0,017356748 | 1,761810071 | LOC642017 | PREDICTED: Homo sapiens hypothetical protein LOC642017 (LOC642017), mRNA.                                                  |
| 0,033432747 | 1,75584944  | LOC730102 | PREDICTED: Homo sapiens misc_RNA (LOC730102), miscRNA.                                                                     |
| 0,046918563 | 1,751122514 | CNRIP1    | Homo sapiens cannabinoid receptor interacting protein 1 (CNRIP1), transcript variant CRIP1b, mRNA.                         |
| 0,040297656 | 1,740715407 | RNU6-15   | Homo sapiens RNA, U6 small nuclear 15 (RNU6-15), small nuclear RNA.                                                        |
| 0,032761743 | 1,740685137 | VILL      | Homo sapiens villin-like (VILL), mRNA.                                                                                     |
| 0,00040903  | 1,735305028 | LOC652183 | PREDICTED: Homo sapiens hypothetical LOC652183 (LOC652183), mRNA.                                                          |
| 0,037820716 | 1,734315589 | LOC729402 | Homo sapiens ribosomal protein L21-like (LOC729402), mRNA.                                                                 |
| 0,02304097  | 1,732374163 | SNORA61   | Homo sapiens small nucleolar RNA, H/ACA box 61 (SNORA61), small nucleolar RNA.                                             |
| 0,041123027 | 1,729611481 | PBK       | Homo sapiens PDZ binding kinase (PBK), mRNA.                                                                               |
| 0,049332111 | 1,727630428 | ANKRD9    | Homo sapiens ankyrin repeat domain 9 (ANKRD9), mRNA.                                                                       |
| 0,038931931 | 1,72682545  | SNORD35B  | Homo sapiens small nucleolar RNA, C/D box 35B (SNORD35B), small nucleolar RNA.                                             |
| 0,012685612 | 1,721743148 | NSL1      | Homo sapiens NSL1, MIND kinetochore complex component, homolog (S. cerevisiae) (NSL1), transcript variant 2, mRNA.         |
| 0,032714589 | 1,701360809 | LASS4     | Homo sapiens LAG1 homolog, ceramide synthase 4 (LASS4), mRNA.                                                              |
| 0,039294436 | 1,699979172 | UGP2      | Homo sapiens UDP-glucose pyrophosphorylase 2 (UGP2), transcript variant 1, mRNA.                                           |
| 0,02939855  | 1,697507904 | PTH1H     | Homo sapiens parathyroid hormone-like hormone (PTH1H), transcript variant 1, mRNA.                                         |
| 0,004690536 | 1,694988345 | KIAA1958  | Homo sapiens KIAA1958 (KIAA1958), mRNA.                                                                                    |
| 0,047179848 | 1,685418733 | ZNF682    | Homo sapiens zinc finger protein 682 (ZNF682), transcript variant 1, mRNA.                                                 |
| 0,028350425 | 1,6788042   | LOC440957 | Homo sapiens similar to CG32736-PA (LOC440957), mRNA.                                                                      |
| 0,021737041 | 1,675814751 | FLJ35776  | Homo sapiens hypothetical LOC649446 (FLJ35776), non-coding RNA.                                                            |
| 0,024183758 | 1,665428746 | MEG3      | Homo sapiens maternally expressed 3 (non-protein coding) (MEG3), transcript variant 1, non-coding RNA. XR_001346-XR_001372 |
| 0,018149493 | 1,658748991 | UCHL1     | Homo sapiens ubiquitin carboxyl-terminal esterase L1 (ubiquitin thiolesterase) (UCHL1), mRNA.                              |
| 0,026692581 | 1,652173913 | LOC646282 | PREDICTED: Homo sapiens misc_RNA (LOC646282), miscRNA.                                                                     |
| 0,036632871 | 1,651986147 | CENPN     | Homo sapiens centromere protein N (CENPN), mRNA.                                                                           |
| 0,0313757   | 1,648549657 | FKBPL     | Homo sapiens FK506 binding protein like (FKBPL), mRNA.                                                                     |
| 0,037441658 | 1,647587031 | CTSH      | Homo sapiens cathepsin H (CTSH), transcript variant 1, mRNA.                                                               |
| 0,000673318 | 1,643073117 | WHSC1L1   | Homo sapiens Wolf-Hirschhorn syndrome candidate 1-like 1 (WHSC1L1), transcript variant long, mRNA.                         |
| 0,000192611 | 1,642716692 | SDHAP2    | Homo sapiens succinate dehydrogenase complex, subunit A, flavoprotein pseudogene 2 (SDHAP2), non-coding RNA.               |
| 0,017168325 | 1,629769663 | USF1      | Homo sapiens upstream transcription factor 1 (USF1), transcript variant 1, mRNA.                                           |
| 0,01328644  | 1,629198909 | NAT1      | PREDICTED: Homo sapiens N-acetyltransferase 1 (arylamine N-acetyltransferase) (NAT1), mRNA.                                |
| 0,013396893 | 1,613981537 | LOC649044 | PREDICTED: Homo sapiens hypothetical protein LOC649043, transcript variant 2 (LOC649044), mRNA.                            |



|             |             |              |                                                                                                                                                                                 |
|-------------|-------------|--------------|---------------------------------------------------------------------------------------------------------------------------------------------------------------------------------|
| 0,010461145 | 1,609903085 | PIR          | Homo sapiens pirin (iron-binding nuclear protein) (PIR), transcript variant 2, mRNA.                                                                                            |
| 0,03845955  | 1,607228744 | SLC39A2      | Homo sapiens solute carrier family 39 (zinc transporter), member 2 (SLC39A2), mRNA.                                                                                             |
| 0,002126175 | 1,59925616  | LOC100129076 | PREDICTED: Homo sapiens similar to FP17469 (LOC100129076), mRNA.                                                                                                                |
| 0,049367435 | 1,597188852 | NSUN5C       | Homo sapiens NOL1/NOP2/Sun domain family, member 5C (NSUN5C), transcript variant 4, mRNA.                                                                                       |
| 0,023773718 | 1,591439972 | TNFSF10      | Homo sapiens tumor necrosis factor (ligand) superfamily, member 10 (TNFSF10), mRNA.                                                                                             |
| 0,007059699 | 1,589987379 | CCNL2        | Homo sapiens cyclin L2 (CCNL2), transcript variant 1, mRNA.                                                                                                                     |
| 0,021470016 | 1,588451221 | ACER2        | Homo sapiens alkaline ceramidase 2 (ACER2), mRNA.                                                                                                                               |
| 0,027536553 | 1,587873462 | DEM1         | Homo sapiens defects in morphology 1 homolog ( <i>S. cerevisiae</i> ) (DEM1), mRNA.                                                                                             |
| 0,009205647 | 1,57572782  | CAV1         | Homo sapiens caveolin 1, caveolae protein, 22kDa (CAV1), mRNA.                                                                                                                  |
| 0,049504391 | 1,575502359 | GSDMB        | Homo sapiens gasdermin B (GSDMB), transcript variant 1, mRNA.                                                                                                                   |
| 0,046643117 | 1,567487483 | C4ORF36      | Homo sapiens chromosome 4 open reading frame 36 (C4orf36), mRNA.                                                                                                                |
| 0,044001165 | 1,564167887 | PI4KAP2      | Homo sapiens phosphatidylinositol 4-kinase, catalytic, alpha polypeptide pseudogene 2 (PI4KAP2), mRNA.                                                                          |
| 0,007352396 | 1,563468851 | NOC2L        | Homo sapiens nucleolar complex associated 2 homolog ( <i>S. cerevisiae</i> ) (NOC2L), mRNA.                                                                                     |
| 0,010172574 | 1,560879094 | TSC22D4      | Homo sapiens TSC22 domain family, member 4 (TSC22D4), mRNA.                                                                                                                     |
| 0,046656077 | 1,559045226 | PHACTR3      | Homo sapiens phosphatase and actin regulator 3 (PHACTR3), transcript variant 3, mRNA.                                                                                           |
| 0,041259433 | 1,557618601 | LOC100131672 | PREDICTED: Homo sapiens misc_RNA (LOC100131672), miscRNA.                                                                                                                       |
| 0,026512229 | 1,55565562  | HIST1H2BH    | Homo sapiens histone cluster 1, H2bh (HIST1H2BH), mRNA.                                                                                                                         |
| 0,033661641 | 1,554343894 | LOC648585    | PREDICTED: Homo sapiens similar to p53-regulated apoptosis-inducing protein 1, transcript variant 1 (LOC648585), mRNA.                                                          |
| 0,022428466 | 1,553840659 | SHB          | Homo sapiens Src homology 2 domain containing adaptor protein B (SHB), mRNA.                                                                                                    |
| 0,045276356 | 1,552120438 | C14ORF176    | PREDICTED: Homo sapiens chromosome 14 open reading frame 176 (C14orf176), mRNA.                                                                                                 |
| 0,015587658 | 1,546401478 | C9ORF7       | Homo sapiens chromosome 9 open reading frame 7 (C9orf7), mRNA.                                                                                                                  |
| 0,048940855 | 1,54261303  | KCNH6        | Homo sapiens potassium voltage-gated channel, subfamily H (eag-related), member 6 (KCNH6), transcript variant 1, mRNA.                                                          |
| 0,04334024  | 1,538294011 | LOC388524    | Homo sapiens ribosomal protein SA pseudogene (LOC388524) on chromosome 19.                                                                                                      |
| 0,006268502 | 1,53015627  | BNC1         | Homo sapiens basonuclin 1 (BNC1), mRNA.                                                                                                                                         |
| 0,042445491 | 1,530020003 | UBE2E1       | Homo sapiens ubiquitin-conjugating enzyme E2E 1 (UBC4/5 homolog, yeast) (UBE2E1), transcript variant 1, mRNA.                                                                   |
| 0,028459877 | 1,522186674 | RANBP9       | Homo sapiens RAN binding protein 9 (RANBP9), mRNA.                                                                                                                              |
| 0,007878284 | 1,520007051 | ATP5G2       | Homo sapiens ATP synthase, H+ transporting, mitochondrial F0 complex, subunit C2 (subunit 9) (ATP5G2), nuclear gene encoding mitochondrial protein, transcript variant 2, mRNA. |
| 0,036098621 | 1,519709375 | LOC100132418 | PREDICTED: Homo sapiens similar to PRO1102 (LOC100132418), mRNA.                                                                                                                |
| 0,026623744 | 1,511915686 | OBFC2A       | Homo sapiens oligonucleotide/oligosaccharide-binding fold containing 2A (OBFC2A), mRNA.                                                                                         |
| 0,013666242 | 1,510156464 | LOC100131968 | PREDICTED: Homo sapiens hypothetical protein LOC100131968 (LOC100131968), mRNA.                                                                                                 |
| 0,023877784 | 1,509730765 | LILRB5       | Homo sapiens leukocyte immunoglobulin-like receptor, subfamily B (with TM and ITIM domains), member 5 (LILRB5), transcript variant 2, mRNA.                                     |

|             |              |           |                                                                                                                                     |
|-------------|--------------|-----------|-------------------------------------------------------------------------------------------------------------------------------------|
| 0,019801013 | 1,504665868  | TTRAP     | Homo sapiens TRAF and TNF receptor associated protein (TTRAP), mRNA.                                                                |
| 0,011214746 | 1,503300795  | CCL5      | Homo sapiens chemokine (C-C motif) ligand 5 (CCL5), mRNA.                                                                           |
| 0,033825297 | 1,502418139  | HIST1H1C  | Homo sapiens histone cluster 1, H1c (HIST1H1C), mRNA.                                                                               |
| 0,040525527 | -1,500403551 | VAPA      | Homo sapiens VAMP (vesicle-associated membrane protein)-associated protein A, 33kDa (VAPA), transcript variant 1, mRNA.             |
| 0,027098077 | -1,507978366 | SFRS11    | Homo sapiens splicing factor, arginine/serine-rich 11 (SFRS11), mRNA.                                                               |
| 0,014792508 | -1,508225948 | SFRS12    | Homo sapiens splicing factor, arginine/serine-rich 12 (SFRS12), transcript variant 2, mRNA.                                         |
| 0,026843329 | -1,510153486 | LOC650369 | PREDICTED: Homo sapiens similar to family with sequence similarity 60, member A (LOC650369), mRNA.                                  |
| 0,048373    | -1,511751393 | MRPL55    | Homo sapiens mitochondrial ribosomal protein L55 (MRPL55), nuclear gene encoding mitochondrial protein, transcript variant 4, mRNA. |
| 0,045762706 | -1,512074338 | EPM2AIP1  | Homo sapiens EPM2A (laforin) interacting protein 1 (EPM2AIP1), mRNA.                                                                |
| 0,007840232 | -1,512959559 | PGBD3     | Homo sapiens piggyBac transposable element derived 3 (PGBD3), mRNA.                                                                 |
| 0,01029456  | -1,515474326 | PHF14     | Homo sapiens PHD finger protein 14 (PHF14), transcript variant 1, mRNA.                                                             |
| 0,008735923 | -1,515581243 | RAPGEF5   | Homo sapiens Rap guanine nucleotide exchange factor (GEF) 5 (RAPGEF5), mRNA.                                                        |
| 0,000534803 | -1,51750538  | ZNF721    | Homo sapiens zinc finger protein 721 (ZNF721), mRNA.                                                                                |
| 0,000783814 | -1,517607656 | MSX1      | Homo sapiens msh homeobox 1 (MSX1), mRNA.                                                                                           |
| 0,04006339  | -1,519622128 | RAB23     | Homo sapiens RAB23, member RAS oncogene family (RAB23), transcript variant 1, mRNA.                                                 |
| 0,012525569 | -1,51997586  | SLC39A9   | Homo sapiens solute carrier family 39 (zinc transporter), member 9 (SLC39A9), mRNA.                                                 |
| 0,006957311 | -1,52029251  | ROR2      | Homo sapiens receptor tyrosine kinase-like orphan receptor 2 (ROR2), mRNA.                                                          |
| 0,016073801 | -1,521660075 | LARGE     | Homo sapiens like-glycosyltransferase (LARGE), transcript variant 1, mRNA.                                                          |
| 0,045323566 | -1,522693954 | CECR1     | Homo sapiens cat eye syndrome chromosome region, candidate 1 (CECR1), transcript variant 2, mRNA.                                   |
| 0,041090913 | -1,52351883  | FLJ39827  | Homo sapiens hypothetical protein FLJ39827 (FLJ39827), mRNA.                                                                        |
| 0,025147062 | -1,523983594 | KIFAP3    | Homo sapiens kinesin-associated protein 3 (KIFAP3), mRNA.                                                                           |
| 0,014166721 | -1,524154313 | PJA2      | Homo sapiens praja 2, RING-H2 motif containing (PJA2), mRNA.                                                                        |
| 0,029266656 | -1,530155367 | C14ORF102 | Homo sapiens chromosome 14 open reading frame 102 (C14orf102), transcript variant 1, mRNA.                                          |
| 0,002780743 | -1,530459565 | RUFY3     | Homo sapiens RUN and FYVE domain containing 3 (RUFY3), transcript variant 2, mRNA.                                                  |
| 0,037064105 | -1,535542626 | WIPF1     | Homo sapiens WAS/WASL interacting protein family, member 1 (WIPF1), transcript variant 2, mRNA.                                     |
| 0,047092692 | -1,537208039 | ARPP19    | Homo sapiens cAMP-regulated phosphoprotein, 19kDa (ARPP19), mRNA.                                                                   |
| 0,039459818 | -1,543362077 | RUNX1     | Homo sapiens runt-related transcription factor 1 (acute myeloid leukemia 1; aml1 oncogene) (RUNX1), transcript variant 1, mRNA.     |
| 0,007807558 | -1,54944072  | EFEMP1    | Homo sapiens EGF-containing fibulin-like extracellular matrix protein 1 (EFEMP1), transcript variant 1, mRNA.                       |
| 0,03800938  | -1,549668223 | AHCTF1    | Homo sapiens AT hook containing transcription factor 1 (AHCTF1), mRNA.                                                              |
| 0,045821243 | -1,557996422 | ARAP3     | Homo sapiens ArfGAP with RhoGAP domain, ankyrin repeat and PH domain 3 (ARAP3), mRNA.                                               |
| 0,000963823 | -1,558095924 | RAI14     | Homo sapiens retinoic acid induced 14 (RAI14), mRNA.                                                                                |

|             |              |           |                                                                                                                                             |
|-------------|--------------|-----------|---------------------------------------------------------------------------------------------------------------------------------------------|
| 0,036491809 | -1,564234596 | HS.156773 | qr06a01.x1 Soares_total_fetus_Nb2HF8_9w Homo sapiens cDNA clone IMAGE:1940040 3, mRNA sequence                                              |
| 0,040003319 | -1,565533451 | HMG20B    | Homo sapiens high-mobility group 20B (HMG20B), mRNA.                                                                                        |
| 0,024552254 | -1,56751164  | LOC650254 | PREDICTED: Homo sapiens similar to hypothetical protein FLJ40722, transcript variant 1 (LOC650254), mRNA.                                   |
| 0,002913113 | -1,570644672 | HNRNPD    | Homo sapiens heterogeneous nuclear ribonucleoprotein D (AU-rich element RNA binding protein 1, 37kDa) (HNRNPD), transcript variant 3, mRNA. |
| 0,003996149 | -1,574166831 | SEC62     | Homo sapiens SEC62 homolog ( <i>S. cerevisiae</i> ) (SEC62), mRNA.                                                                          |
| 0,034368576 | -1,576563354 | FAM110B   | Homo sapiens family with sequence similarity 110, member B (FAM110B), mRNA.                                                                 |
| 0,039691039 | -1,577602516 | RIPK5     | Homo sapiens receptor interacting protein kinase 5 (RIPK5), transcript variant 2, mRNA.                                                     |
| 0,010319132 | -1,582556659 | WDR5      | Homo sapiens WD repeat domain 5 (WDR5), transcript variant 1, mRNA.                                                                         |
| 0,03653684  | -1,584036859 | PTAR1     | Homo sapiens protein prenyltransferase alpha subunit repeat containing 1 (PTAR1), mRNA.                                                     |
| 0,010817726 | -1,585384701 | GAS1      | Homo sapiens growth arrest-specific 1 (GAS1), mRNA.                                                                                         |
| 0,016672728 | -1,585804454 | TFDP2     | Homo sapiens transcription factor Dp-2 (E2F dimerization partner 2) (TFDP2), mRNA.                                                          |
| 0,028930804 | -1,58589353  | ZNF2      | Homo sapiens zinc finger protein 2 (ZNF2), transcript variant 1, mRNA.                                                                      |
| 0,004364838 | -1,586572142 | ETS1      | Homo sapiens v-ets erythroblastosis virus E26 oncogene homolog 1 (avian) (ETS1), mRNA.                                                      |
| 0,04189443  | -1,592213697 | ARFRP1    | Homo sapiens ADP-ribosylation factor related protein 1 (ARFRP1), mRNA.                                                                      |
| 0,036168363 | -1,593644395 | OSBPL8    | Homo sapiens oxysterol binding protein-like 8 (OSBPL8), transcript variant 2, mRNA.                                                         |
| 0,011107255 | -1,59484229  | FMOD      | Homo sapiens fibromodulin (FMOD), mRNA.                                                                                                     |
| 0,022158189 | -1,59690097  | PDGFRA    | Homo sapiens platelet-derived growth factor receptor, alpha polypeptide (PDGFRA), mRNA.                                                     |
| 0,013511165 | -1,598194496 | FKBP14    | Homo sapiens FK506 binding protein 14, 22 kDa (FKBP14), mRNA.                                                                               |
| 0,031854018 | -1,59913368  | PARVA     | Homo sapiens parvin, alpha (PARVA), mRNA.                                                                                                   |
| 0,039315634 | -1,602856699 | BNC2      | Homo sapiens basenuclin 2 (BNC2), mRNA.                                                                                                     |
| 0,032170624 | -1,602875045 | NMI       | Homo sapiens N-myc (and STAT) interactor (NMI), mRNA.                                                                                       |
| 0,032915986 | -1,602938604 | EPCAM     | Homo sapiens epithelial cell adhesion molecule (EPCAM), mRNA.                                                                               |
| 0,044397566 | -1,606922618 | RNF24     | Homo sapiens ring finger protein 24 (RNF24), mRNA.                                                                                          |
| 0,009252778 | -1,607120981 | EMX2      | Homo sapiens empty spiracles homeobox 2 (EMX2), mRNA.                                                                                       |
| 0,007502833 | -1,607201349 | PDGFD     | Homo sapiens platelet derived growth factor D (PDGFD), transcript variant 2, mRNA.                                                          |
| 0,02271795  | -1,607421707 | MTMR9     | Homo sapiens myotubularin related protein 9 (MTMR9), mRNA.                                                                                  |
| 0,043724742 | -1,611424205 | DNAJC18   | Homo sapiens DnaJ (Hsp40) homolog, subfamily C, member 18 (DNAJC18), mRNA.                                                                  |
| 0,032755841 | -1,612293554 | LOX       | Homo sapiens lysyl oxidase (LOX), mRNA.                                                                                                     |
| 0,037428281 | -1,61658706  | RTN4R     | Homo sapiens reticulon 4 receptor (RTN4R), mRNA.                                                                                            |
| 0,006791755 | -1,617133461 | HS.213061 | Homo sapiens cDNA FLJ38536 fis, clone HCHON2001200                                                                                          |
| 0,016929585 | -1,617316444 | MYADM     | Homo sapiens myeloid-associated differentiation marker (MYADM), transcript variant 2, mRNA.                                                 |
| 0,002021385 | -1,619117889 | MBNL1     | Homo sapiens muscleblind-like ( <i>Drosophila</i> ) (MBNL1), transcript variant 6, mRNA.                                                    |
| 0,007863568 | -1,620475705 | FSTL1     | Homo sapiens follistatin-like 1 (FSTL1), mRNA.                                                                                              |
| 0,007502781 | -1,622346859 | TXNIP     | Homo sapiens thioredoxin interacting protein (TXNIP), mRNA.                                                                                 |

|             |              |           |                                                                                                                                                                                             |
|-------------|--------------|-----------|---------------------------------------------------------------------------------------------------------------------------------------------------------------------------------------------|
| 0,020609495 | -1,626602564 | ATP5G3    | Homo sapiens ATP synthase, H <sup>+</sup> transporting, mitochondrial F0 complex, subunit C3 (subunit 9) (ATP5G3), nuclear gene encoding mitochondrial protein, transcript variant 3, mRNA. |
| 0,044754398 | -1,628302472 | SMN1      | Homo sapiens survival of motor neuron 1, telomeric (SMN1), transcript variant d, mRNA.                                                                                                      |
| 0,035921485 | -1,631767668 | COL3A1    | Homo sapiens collagen, type III, alpha 1 (COL3A1), mRNA.                                                                                                                                    |
| 0,004437979 | -1,631898455 | LOC730996 | PREDICTED: Homo sapiens similar to chromosome 1 open reading frame 80 (LOC730996), mRNA.                                                                                                    |
| 0,044111769 | -1,632295105 | MAP4K4    | Homo sapiens mitogen-activated protein kinase kinase kinase 4 (MAP4K4), transcript variant 3, mRNA.                                                                                         |
| 0,030279884 | -1,635261708 | SF1       | Homo sapiens splicing factor 1 (SF1), transcript variant 1, mRNA.                                                                                                                           |
| 0,009496217 | -1,635632904 | DCAF7     | Homo sapiens DDB1 and CUL4 associated factor 7 (DCAF7), mRNA.                                                                                                                               |
| 0,030958435 | -1,642246281 | COL4A1    | Homo sapiens collagen, type IV, alpha 1 (COL4A1), mRNA.                                                                                                                                     |
| 0,03148724  | -1,642338141 | ANKRD32   | Homo sapiens ankyrin repeat domain 32 (ANKRD32), mRNA.                                                                                                                                      |
| 0,023347797 | -1,646038382 | HS.130036 | Homo sapiens cDNA FLJ42306 fis, clone TRACH2001646                                                                                                                                          |
| 0,033835164 | -1,648387731 | CTXN1     | Homo sapiens cortixin 1 (CTXN1), mRNA.                                                                                                                                                      |
| 0,038111137 | -1,650037984 | C10ORF67  | Homo sapiens chromosome 10 open reading frame 67 (C10orf67), mRNA.                                                                                                                          |
| 0,018464916 | -1,650986636 | PFAS      | Homo sapiens phosphoribosylformylglycinamide synthase (FGAR amidotransferase) (PFAS), mRNA.                                                                                                 |
| 0,04301857  | -1,653138144 | IPO7      | Homo sapiens importin 7 (IPO7), mRNA.                                                                                                                                                       |
| 0,002528925 | -1,654818057 | GAS1      | Homo sapiens growth arrest-specific 1 (GAS1), mRNA.                                                                                                                                         |
| 0,03516294  | -1,657795835 | RAB11FIP2 | Homo sapiens RAB11 family interacting protein 2 (class I) (RAB11FIP2), mRNA.                                                                                                                |
| 0,03978388  | -1,660781321 | FNDC3A    | Homo sapiens fibronectin type III domain containing 3A (FNDC3A), transcript variant 1, mRNA.                                                                                                |
| 0,018271184 | -1,67202889  | LEPREL2   | Homo sapiens leprecan-like 2 (LEPREL2), mRNA.                                                                                                                                               |
| 0,012567392 | -1,678439557 | PFTK1     | Homo sapiens PFTAIRE protein kinase 1 (PFTK1), mRNA.                                                                                                                                        |
| 0,020794184 | -1,679171188 | FZD4      | Homo sapiens frizzled homolog 4 (Drosophila) (FZD4), mRNA.                                                                                                                                  |
| 0,017896312 | -1,681127518 | LRRC58    | PREDICTED: Homo sapiens leucine rich repeat containing 58 (LRRC58), mRNA.                                                                                                                   |
| 0,02648941  | -1,682242028 | EIF5A2    | Homo sapiens eukaryotic translation initiation factor 5A2 (EIF5A2), mRNA.                                                                                                                   |
| 0,036335114 | -1,683371107 | IVD       | Homo sapiens isovaleryl Coenzyme A dehydrogenase (IVD), nuclear gene encoding mitochondrial protein, mRNA.                                                                                  |
| 0,035104742 | -1,686051188 | VGLL3     | Homo sapiens vestigial like 3 (Drosophila) (VGLL3), mRNA.                                                                                                                                   |
| 0,024610742 | -1,688115643 | EGFL6     | Homo sapiens EGF-like-domain, multiple 6 (EGFL6), mRNA.                                                                                                                                     |
| 0,039412101 | -1,690452149 | TGFBRAP1  | Homo sapiens transforming growth factor, beta receptor associated protein 1 (TGFBRAP1), mRNA.                                                                                               |
| 0,019963129 | -1,694991168 | RFC3      | Homo sapiens replication factor C (activator 1) 3, 38kDa (RFC3), transcript variant 1, mRNA.                                                                                                |
| 0,032699615 | -1,698519808 | C8ORF30B  | PREDICTED: Homo sapiens chromosome 8 open reading frame 30B (C8orf30B), mRNA.                                                                                                               |
| 0,03660173  | -1,700189015 | GGCX      | Homo sapiens gamma-glutamyl carboxylase (GGCX), mRNA.                                                                                                                                       |
| 0,022788017 | -1,706650023 | ELK3      | Homo sapiens ELK3, ETS-domain protein (SRF accessory protein 2) (ELK3), mRNA.                                                                                                               |
| 0,036279963 | -1,706697699 | SYT11     | Homo sapiens synaptotagmin XI (SYT11), mRNA.                                                                                                                                                |
| 0,01621388  | -1,706826743 | TSPAN9    | Homo sapiens tetraspanin 9 (TSPAN9), mRNA.                                                                                                                                                  |
| 0,040500032 | -1,713048433 | TDRD3     | Homo sapiens tudor domain containing 3 (TDRD3), mRNA.                                                                                                                                       |
| 0,032932904 | -1,713533158 | COL1A2    | Homo sapiens collagen, type I, alpha 2 (COL1A2), mRNA.                                                                                                                                      |
| 0,025087492 | -1,71697427  | SEN7      | Homo sapiens SUMO1/sentrin specific peptidase 7 (SEN7), transcript variant 2, mRNA.                                                                                                         |

|             |              |           |                                                                                                               |
|-------------|--------------|-----------|---------------------------------------------------------------------------------------------------------------|
| 0,044304117 | -1,717066033 | DDIT4L    | Homo sapiens DNA-damage-inducible transcript 4-like (DDIT4L), mRNA.                                           |
| 0,027861433 | -1,721483018 | ADARB1    | Homo sapiens adenosine deaminase, RNA-specific, B1 (RED1 homolog rat) (ADARB1), transcript variant 1, mRNA.   |
| 0,040698949 | -1,722571599 | NR2F1     | Homo sapiens nuclear receptor subfamily 2, group F, member 1 (NR2F1), mRNA.                                   |
| 0,037041775 | -1,72306525  | SBK1      | Homo sapiens SH3-binding domain kinase 1 (SBK1), mRNA.                                                        |
| 0,023420977 | -1,725476237 | RAB11FIP2 | Homo sapiens RAB11 family interacting protein 2 (class I) (RAB11FIP2), mRNA.                                  |
| 0,009802157 | -1,730060656 | FNDC3A    | Homo sapiens fibronectin type III domain containing 3A (FNDC3A), transcript variant 1, mRNA.                  |
| 0,041666638 | -1,731010914 | PPAPDC1A  | Homo sapiens phosphatidic acid phosphatase type 2 domain containing 1A (PPAPDC1A), mRNA.                      |
| 0,037222628 | -1,731617174 | CAMKK2    | Homo sapiens calcium/calmodulin-dependent protein kinase kinase 2, beta (CAMKK2), transcript variant 4, mRNA. |
| 0,023303932 | -1,732613099 | PURA      | Homo sapiens purine-rich element binding protein A (PURA), mRNA.                                              |
| 0,044283367 | -1,736157956 | DFFA      | Homo sapiens DNA fragmentation factor, 45kDa, alpha polypeptide (DFFA), transcript variant 1, mRNA.           |
| 0,034087121 | -1,737366826 | ZNF227    | Homo sapiens zinc finger protein 227 (ZNF227), mRNA.                                                          |
| 0,032830408 | -1,740175953 | C21ORF45  | Homo sapiens chromosome 21 open reading frame 45 (C21orf45), mRNA.                                            |
| 0,000715688 | -1,742516742 | STMN3     | Homo sapiens stathmin-like 3 (STMN3), mRNA.                                                                   |
| 0,045083026 | -1,744418336 | JAM3      | Homo sapiens junctional adhesion molecule 3 (JAM3), mRNA.                                                     |
| 0,01887513  | -1,744708995 | MYO16     | Homo sapiens myosin XVI (MYO16), mRNA.                                                                        |
| 0,010493808 | -1,748116636 | NLGN4Y    | Homo sapiens neuroligin 4, Y-linked (NLGN4Y), mRNA.                                                           |
| 0,015432634 | -1,748184443 | RRP1B     | Homo sapiens ribosomal RNA processing 1 homolog B (S. cerevisiae) (RRP1B), mRNA.                              |
| 0,029860634 | -1,750843061 | LOC729920 | Homo sapiens notch1-induced protein (LOC729920), transcript variant 2, mRNA.                                  |
| 0,003202999 | -1,757736365 | SYMPK     | Homo sapiens symplekin (SYMPK), mRNA.                                                                         |
| 0,020226479 | -1,761344241 | HS.296031 | Homo sapiens cDNA clone IMAGE:5262734                                                                         |
| 0,036279245 | -1,765987853 | NAAA      | Homo sapiens N-acyl ethanolamine acid amidase (NAAA), transcript variant 1, mRNA.                             |
| 0,013454495 | -1,766658743 | 40787     | Homo sapiens septin 11 (SEPT11), mRNA.                                                                        |
| 0,030673361 | -1,767844387 | LOC149448 | PREDICTED: Homo sapiens hypothetical protein LOC149448 (LOC149448), mRNA.                                     |
| 0,001628316 | -1,770288333 | LOC284276 | Homo sapiens hypothetical LOC284276 (LOC284276), non-coding RNA.                                              |
| 0,024944376 | -1,771574285 | WNT5A     | Homo sapiens wntless-type MMTV integration site family, member 5A (WNT5A), mRNA.                              |
| 0,006160062 | -1,775756777 | C13ORF15  | Homo sapiens chromosome 13 open reading frame 15 (C13orf15), mRNA.                                            |
| 0,019890023 | -1,775785566 | RGS4      | Homo sapiens regulator of G-protein signalling 4 (RGS4), mRNA.                                                |
| 0,046637998 | -1,788496188 | TOX2      | Homo sapiens TOX high mobility group box family member 2 (TOX2), transcript variant 1, mRNA.                  |
| 0,02723767  | -1,790606328 | FNDC1     | Homo sapiens fibronectin type III domain containing 1 (FNDC1), mRNA.                                          |
| 0,032677308 | -1,794065324 | GREM1     | Homo sapiens gremlin 1, cysteine knot superfamily, homolog (Xenopus laevis) (GREM1), mRNA.                    |
| 0,008676379 | -1,796827961 | C17ORF101 | Homo sapiens chromosome 17 open reading frame 101 (C17orf101), transcript variant 2, mRNA.                    |
| 0,046814398 | -1,797307222 | FANK1     | Homo sapiens fibronectin type III and ankyrin repeat domains 1 (FANK1), mRNA.                                 |
| 0,040517654 | -1,808162756 | HEPH      | Homo sapiens hephaestin (HEPH), transcript variant 1, mRNA.                                                   |

|             |              |              |                                                                                                                   |
|-------------|--------------|--------------|-------------------------------------------------------------------------------------------------------------------|
| 0,022608386 | -1,809892729 | HS.545687    | wy61a09.x1 Soares_NSF_F8_9W_OT_PA_P_S1 Homo sapiens cDNA clone IMAGE:2553016 3, mRNA sequence                     |
| 0,049720055 | -1,816083206 | MAPK1        | Homo sapiens mitogen-activated protein kinase 1 (MAPK1), transcript variant 1, mRNA.                              |
| 0,028206217 | -1,82861281  | LSS          | Homo sapiens lanosterol synthase (2,3-oxidosqualene-lanosterol cyclase) (LSS), transcript variant 1, mRNA.        |
| 0,00119764  | -1,833384998 | ZAK          | Homo sapiens sterile alpha motif and leucine zipper containing kinase AZK (ZAK), transcript variant 2, mRNA.      |
| 0,021759432 | -1,835260116 | NOC4L        | Homo sapiens nucleolar complex associated 4 homolog (S. cerevisiae) (NOC4L), mRNA.                                |
| 0,035531995 | -1,837454494 | GPC4         | Homo sapiens glypican 4 (GPC4), mRNA.                                                                             |
| 0,038576171 | -1,837640457 | OLFML2A      | Homo sapiens olfactomedin-like 2A (OLFML2A), mRNA.                                                                |
| 0,010127634 | -1,838638152 | FAM174B      | Homo sapiens family with sequence similarity 174, member B (FAM174B), mRNA.                                       |
| 0,008675307 | -1,851826087 | LOC283332    | PREDICTED: Homo sapiens misc_RNA (LOC283332), miscRNA.                                                            |
| 0,040814711 | -1,871930255 | PDF          | Homo sapiens peptide deformylase (mitochondrial) (PDF), nuclear gene encoding mitochondrial protein, mRNA.        |
| 0,022269361 | -1,873874728 | PDGFD        | Homo sapiens platelet derived growth factor D (PDGFD), transcript variant 1, mRNA.                                |
| 0,039842694 | -1,881179138 | LOC100130552 | PREDICTED: Homo sapiens similar to hCG1782906 (LOC100130552), mRNA.                                               |
| 0,034239665 | -1,886894075 | SCCPDH       | Homo sapiens saccharopine dehydrogenase (putative) (SCCPDH), mRNA.                                                |
| 0,012143508 | -1,892283322 | PYCR1        | Homo sapiens pyrroline-5-carboxylate reductase 1 (PYCR1), transcript variant 1, mRNA.                             |
| 0,011987509 | -1,896571807 | NFIX         | Homo sapiens nuclear factor I/X (CCAAT-binding transcription factor) (NFIX), mRNA.                                |
| 0,03621349  | -1,900859939 | PDS5B        | Homo sapiens PDS5, regulator of cohesion maintenance, homolog B (S. cerevisiae) (PDS5B), mRNA.                    |
| 0,043309336 | -1,90236933  | SPON1        | Homo sapiens spondin 1, extracellular matrix protein (SPON1), mRNA.                                               |
| 0,024384325 | -1,904478168 | LOXL3        | Homo sapiens lysyl oxidase-like 3 (LOXL3), mRNA.                                                                  |
| 0,022328408 | -1,923234355 | TACSTD1      | Homo sapiens tumor-associated calcium signal transducer 1 (TACSTD1), mRNA.                                        |
| 0,008221198 | -1,923799777 | MCFD2        | Homo sapiens multiple coagulation factor deficiency 2 (MCFD2), mRNA.                                              |
| 0,0232798   | -1,928691099 | NFIB         | Homo sapiens nuclear factor I/B (NFIB), mRNA.                                                                     |
| 0,049606385 | -1,931896719 | SEZ6L2       | Homo sapiens seizure related 6 homolog (mouse)-like 2 (SEZ6L2), transcript variant 2, mRNA.                       |
| 0,022040268 | -1,935037605 | ANTXR1       | Homo sapiens anthrax toxin receptor 1 (ANTXR1), transcript variant 1, mRNA.                                       |
| 0,027607025 | -1,936599424 | FGF13        | Homo sapiens fibroblast growth factor 13 (FGF13), transcript variant 1A, mRNA.                                    |
| 0,018973738 | -1,937201846 | PTPN9        | PREDICTED: Homo sapiens protein tyrosine phosphatase, non-receptor type 9 (PTPN9), mRNA.                          |
| 0,049373074 | -1,938745087 | ZBTB20       | Homo sapiens zinc finger and BTB domain containing 20 (ZBTB20), mRNA.                                             |
| 0,017547243 | -1,941236275 | KAT5         | Homo sapiens K(lysine) acetyltransferase 5 (KAT5), transcript variant 3, mRNA.                                    |
| 0,026183356 | -1,944484806 | STC2         | Homo sapiens stanniocalcin 2 (STC2), mRNA.                                                                        |
| 0,009160025 | -1,947272727 | PBRM1        | Homo sapiens polybromo 1 (PBRM1), transcript variant 4, mRNA.                                                     |
| 0,044110531 | -1,950040331 | RAPH1        | Homo sapiens Ras association (RalGDS/AF-6) and pleckstrin homology domains 1 (RAPH1), transcript variant 1, mRNA. |
| 0,012036141 | -1,951803872 | SSBP3        | Homo sapiens single stranded DNA binding protein 3 (SSBP3), transcript variant 2, mRNA.                           |



|             |              |              |                                                                                                                  |
|-------------|--------------|--------------|------------------------------------------------------------------------------------------------------------------|
| 0,011914869 | -1,951905388 | HS2ST1       | Homo sapiens heparan sulfate 2-O-sulfotransferase 1 (HS2ST1), mRNA.                                              |
| 0,029582003 | -1,952785396 | PSIP1        | Homo sapiens PC4 and SFRS1 interacting protein 1 (PSIP1), transcript variant 2, mRNA.                            |
| 0,028863332 | -1,953921569 | LRP12        | Homo sapiens low density lipoprotein-related protein 12 (LRP12), mRNA.                                           |
| 0,0387093   | -1,961966857 | KLHL5        | Homo sapiens kelch-like 5 (Drosophila) (KLHL5), transcript variant 3, mRNA.                                      |
| 0,032887479 | -1,968942815 | TGOLN2       | Homo sapiens trans-golgi network protein 2 (TGOLN2), mRNA.                                                       |
| 0,039561843 | -2,002669696 | KIAA1644     | PREDICTED: Homo sapiens KIAA1644 protein (KIAA1644), mRNA.                                                       |
| 0,032528625 | -2,009487666 | LOC100130494 | PREDICTED: Homo sapiens hypothetical protein LOC100130494 (LOC100130494), mRNA.                                  |
| 0,042331339 | -2,01054732  | HS.308073    | aa12g07.r1 Soares_NhHMPu_S1 Homo sapiens cDNA clone IMAGE:813084 5, mRNA sequence                                |
| 0,040002941 | -2,019657291 | SOCS4        | Homo sapiens suppressor of cytokine signaling 4 (SOCS4), transcript variant 2, mRNA.                             |
| 0,021723179 | -2,02056374  | GREM1        | Homo sapiens gremlin 1, cysteine knot superfamily, homolog (Xenopus laevis) (GREM1), mRNA.                       |
| 0,035115834 | -2,024178756 | HS.547201    | UI-E-CL1-aez-g-19-0-UI.s1 UI-E-CL1 Homo sapiens cDNA clone UI-E-CL1-aez-g-19-0-UI 3, mRNA sequence               |
| 0,043147106 | -2,024365309 | STEAP2       | Homo sapiens six transmembrane epithelial antigen of the prostate 2 (STEAP2), mRNA.                              |
| 0,042229453 | -2,026383526 | C4ORF43      | Homo sapiens chromosome 4 open reading frame 43 (C4orf43), mRNA.                                                 |
| 0,013598145 | -2,027393159 | LOC100129034 | PREDICTED: Homo sapiens hypothetical protein LOC100129034 (LOC100129034), mRNA.                                  |
| 0,033120652 | -2,033814971 | C1ORF165     | Homo sapiens chromosome 1 open reading frame 165 (C1orf165), mRNA.                                               |
| 0,024997314 | -2,041030946 | NHS          | Homo sapiens Nance-Horan syndrome (congenital cataracts and dental anomalies) (NHS), transcript variant 1, mRNA. |
| 0,032176415 | -2,044346225 | SNX1         | Homo sapiens sorting nexin 1 (SNX1), transcript variant 1, mRNA.                                                 |
| 0,042707944 | -2,053708791 | PER3         | Homo sapiens period homolog 3 (Drosophila) (PER3), mRNA.                                                         |
| 0,047216093 | -2,056057882 | CRISPLD2     | Homo sapiens cysteine-rich secretory protein LCCL domain containing 2 (CRISPLD2), mRNA.                          |
| 0,000738873 | -2,057484946 | FLJ10781     | Homo sapiens hypothetical protein FLJ10781 (FLJ10781), mRNA.                                                     |
| 0,002844808 | -2,088034474 | HS.370359    | Homo sapiens mRNA; cDNA DKFZp686F09166 (from clone DKFZp686F09166)                                               |
| 0,010976105 | -2,093795318 | HS.40289     | Homo sapiens mRNA; cDNA DKFZp686I23208 (from clone DKFZp686I23208)                                               |
| 0,004148824 | -2,115789029 | SLC2A5       | Homo sapiens solute carrier family 2 (facilitated glucose/fructose transporter), member 5 (SLC2A5), mRNA.        |
| 0,029527344 | -2,117637278 | LEP          | Homo sapiens leptin (obesity homolog, mouse) (LEP), mRNA.                                                        |
| 0,049884471 | -2,133667335 | TBC1D24      | Homo sapiens TBC1 domain family, member 24 (TBC1D24), mRNA. XM_945422                                            |
| 0,008784089 | -2,135571732 | LOC100128892 | PREDICTED: Homo sapiens hypothetical protein LOC100128892 (LOC100128892), mRNA.                                  |
| 0,049869394 | -2,138528458 | SLC30A5      | Homo sapiens solute carrier family 30 (zinc transporter), member 5 (SLC30A5), transcript variant 1, mRNA.        |
| 0,014203401 | -2,138791946 | RFX5         | Homo sapiens regulatory factor X, 5 (influences HLA class II expression) (RFX5), transcript variant 1, mRNA.     |
| 0,007832201 | -2,16614032  | SLC2A3       | Homo sapiens solute carrier family 2 (facilitated glucose transporter), member 3 (SLC2A3), mRNA.                 |
| 0,041934266 | -2,17039013  | ZNF761       | Homo sapiens zinc finger protein 761 (ZNF761), mRNA.                                                             |
| 0,029941434 | -2,172306322 | IL1RAP       | Homo sapiens interleukin 1 receptor accessory protein (IL1RAP), transcript variant 2, mRNA.                      |
| 0,022099836 | -2,187538254 | SPAST        | Homo sapiens spastin (SPAST), transcript variant 2, mRNA.                                                        |

|             |              |              |                                                                                                                        |
|-------------|--------------|--------------|------------------------------------------------------------------------------------------------------------------------|
| 0,003694866 | -2,191150341 | FRMD4A       | Homo sapiens FERM domain containing 4A (FRMD4A), mRNA.                                                                 |
| 0,026805983 | -2,202972091 | CCL28        | Homo sapiens chemokine (C-C motif) ligand 28 (CCL28), mRNA.                                                            |
| 0,044275885 | -2,212258283 | CREB3        | Homo sapiens cAMP responsive element binding protein 3 (CREB3), mRNA.                                                  |
| 0,04091574  | -2,227361141 | LOC643854    | PREDICTED: Homo sapiens misc_RNA (LOC643854), miscRNA.                                                                 |
| 0,006297232 | -2,255145278 | PRSS42       | Homo sapiens protease, serine, 42 (PRSS42), mRNA.                                                                      |
| 0,031525363 | -2,272844089 | TSPYL2       | Homo sapiens TSPY-like 2 (TSPYL2), mRNA.                                                                               |
| 0,043231807 | -2,274732804 | LOC100133075 | PREDICTED: Homo sapiens misc_RNA (LOC100133075), miscRNA.                                                              |
| 0,001105079 | -2,276152958 | INHBB        | Homo sapiens inhibin, beta B (activin AB beta polypeptide) (INHBB), mRNA.                                              |
| 0,035473243 | -2,302249637 | ZKSCAN2      | Homo sapiens zinc finger with KRAB and SCAN domains 2 (ZKSCAN2), mRNA.                                                 |
| 0,032327753 | -2,315054496 | LRRN3        | Homo sapiens leucine rich repeat neuronal 3 (LRRN3), mRNA.                                                             |
| 0,013723111 | -2,317389138 | HIC1         | Homo sapiens hypermethylated in cancer 1 (HIC1), transcript variant 2, mRNA.                                           |
| 0,010711141 | -2,325692455 | RNASEH2C     | Homo sapiens ribonuclease H2, subunit C (RNASEH2C), mRNA.                                                              |
| 0,037235539 | -2,327806122 | ORC4L        | Homo sapiens origin recognition complex, subunit 4-like (yeast) (ORC4L), transcript variant 3, mRNA.                   |
| 0,045820223 | -2,337264799 | SCARF2       | Homo sapiens scavenger receptor class F, member 2 (SCARF2), transcript variant 1, mRNA.                                |
| 0,026074545 | -2,338437446 | GXYLT1       | Homo sapiens glucoside xylosyltransferase 1 (GXYLT1), transcript variant 2, mRNA.                                      |
| 0,000974954 | -2,352640845 | SP4          | Homo sapiens Sp4 transcription factor (SP4), mRNA.                                                                     |
| 0,026993374 | -2,364985571 | LOC647474    | PREDICTED: Homo sapiens similar to heterogeneous nuclear ribonucleoprotein A3, transcript variant 2 (LOC647474), mRNA. |
| 0,027452989 | -2,384063337 | ZFHX3        | Homo sapiens zinc finger homeobox 3 (ZFHX3), transcript variant A, mRNA.                                               |
| 0,04573327  | -2,395989123 | CCDC68       | Homo sapiens coiled-coil domain containing 68 (CCDC68), mRNA.                                                          |
| 0,035088156 | -2,409583345 | LEP          | Homo sapiens leptin (obesity homolog, mouse) (LEP), mRNA.                                                              |
| 0,002683522 | -2,416531843 | LBH          | PREDICTED: Homo sapiens hypothetical protein DKFZp566J091 (LBH), mRNA.                                                 |
| 0,047901154 | -2,427840447 | MXRA7        | Homo sapiens matrix-remodelling associated 7 (MXRA7), transcript variant 3, mRNA.                                      |
| 0,018626652 | -2,446970628 | ZWILCH       | Homo sapiens Zwilch, kinetochore associated, homolog (Drosophila) (ZWILCH), transcript variant 1, mRNA.                |
| 0,011666872 | -2,461827957 | HS.158923    | Homo sapiens mRNA; cDNA DKFZp434K0722 (from clone DKFZp434K0722)                                                       |
| 0,034519704 | -2,466954611 | TUBB2B       | Homo sapiens tubulin, beta 2B (TUBB2B), mRNA.                                                                          |
| 0,00532546  | -2,470525315 | HSPB7        | Homo sapiens heat shock 27kDa protein family, member 7 (cardiovascular) (HSPB7), mRNA.                                 |
| 0,019476356 | -2,479888949 | CCDC8        | Homo sapiens coiled-coil domain containing 8 (CCDC8), mRNA.                                                            |
| 0,008952574 | -2,493402884 | CCDC80       | Homo sapiens coiled-coil domain containing 80 (CCDC80), transcript variant 1, mRNA.                                    |
| 0,04035028  | -2,555232558 | LOC728832    | PREDICTED: Homo sapiens hypothetical protein LOC728832 (LOC728832), mRNA.                                              |
| 0,027884072 | -2,556699782 | NLK          | Homo sapiens nemo-like kinase (NLK), mRNA.                                                                             |
| 0,04510954  | -2,557933698 | DUSP2        | Homo sapiens dual specificity phosphatase 2 (DUSP2), mRNA.                                                             |
| 0,047773236 | -2,572600976 | COL11A1      | Homo sapiens collagen, type XI, alpha 1 (COL11A1), transcript variant A, mRNA.                                         |
| 0,035639115 | -2,573865518 | C6ORF188     | Homo sapiens chromosome 6 open reading frame 188 (C6orf188), mRNA.                                                     |
| 0,03456043  | -2,655425659 | PPIG         | Homo sapiens peptidylprolyl isomerase G (cyclophilin G) (PPIG), mRNA.                                                  |

|             |              |              |                                                                                                                                               |
|-------------|--------------|--------------|-----------------------------------------------------------------------------------------------------------------------------------------------|
| 0,006125265 | -2,681618887 | STK38L       | Homo sapiens serine/threonine kinase 38 like (STK38L), mRNA.                                                                                  |
| 0,049068386 | -2,767566362 | LPPR4        | Homo sapiens plasticity related gene 1 (LPPR4), mRNA.                                                                                         |
| 0,002342719 | -2,843046184 | NDP          | Homo sapiens Norrie disease (pseudoglioma) (NDP), mRNA.                                                                                       |
| 0,045098655 | -2,844436485 | CACNA1C      | Homo sapiens calcium channel, voltage-dependent, L type, alpha 1C subunit (CACNA1C), mRNA.                                                    |
| 0,027141585 | -2,849090909 | HS.560906    | DA173998 BRAMY2 Homo sapiens cDNA clone BRAMY2037005 5, mRNA sequence                                                                         |
| 0,018431136 | -2,849763237 | NEDD9        | Homo sapiens neural precursor cell expressed, developmentally down-regulated 9 (NEDD9), transcript variant 1, mRNA.                           |
| 0,010323717 | -2,902796031 | FNDC1        | Homo sapiens fibronectin type III domain containing 1 (FNDC1), mRNA.                                                                          |
| 0,048203606 | -2,909785933 | ZBTB8A       | Homo sapiens zinc finger and BTB domain containing 8A (ZBTB8A), mRNA. XM_945039                                                               |
| 0,048052355 | -2,917124902 | ZAK          | Homo sapiens sterile alpha motif and leucine zipper containing kinase AZK (ZAK), transcript variant 1, mRNA.                                  |
| 0,042092289 | -2,928997686 | LOC255480    | PREDICTED: Homo sapiens hypothetical protein LOC255480 (LOC255480), mRNA.                                                                     |
| 0,003197682 | -2,948654244 | CHKA         | Homo sapiens choline kinase alpha (CHKA), transcript variant 2, mRNA.                                                                         |
| 0,035559147 | -2,958333333 | DENND5B      | Homo sapiens DENN/MADD domain containing 5B (DENND5B), mRNA.                                                                                  |
| 0,006501034 | -2,963861386 | CSTF2T       | Homo sapiens cleavage stimulation factor, 3' pre-RNA, subunit 2, 64kDa, tau variant (CSTF2T), mRNA.                                           |
| 0,002224009 | -2,983669026 | NCAPG2       | Homo sapiens non-SMC condensin II complex, subunit G2 (NCAPG2), mRNA.                                                                         |
| 0,029036639 | -3,002974969 | HDAC4        | Homo sapiens histone deacetylase 4 (HDAC4), mRNA.                                                                                             |
| 0,017697417 | -3,006223259 | LOC100190939 | Homo sapiens hypothetical LOC100190939 (LOC100190939), non-coding RNA.                                                                        |
| 0,03328981  | -3,026657061 | C14ORF37     | Homo sapiens chromosome 14 open reading frame 37 (C14orf37), mRNA.                                                                            |
| 0,013969902 | -3,169569854 | GUCA1A       | Homo sapiens guanylate cyclase activator 1A (retina) (GUCA1A), mRNA.                                                                          |
| 0,037345747 | -3,2326856   | LOC650815    | PREDICTED: Homo sapiens similar to T-cell receptor alpha chain V region CTL-L17 precursor (LOC650815), mRNA.                                  |
| 0,011486308 | -3,248763251 | HS.536125    | CR744726 Homo sapiens library (Ebert L) Homo sapiens cDNA clone IMAGEp971008109 ; IMAGE:37816 3, mRNA sequence                                |
| 0,022808403 | -3,30482977  | MASP1        | Homo sapiens mannan-binding lectin serine peptidase 1 (C4/C2 activating component of Ra-reactive factor) (MASP1), transcript variant 3, mRNA. |
| 0,045969214 | -3,348113208 | ALKBH8       | Homo sapiens alkB, alkylation repair homolog 8 (E. coli) (ALKBH8), mRNA.                                                                      |
| 0,016377123 | -3,362339515 | C19ORF28     | Homo sapiens chromosome 19 open reading frame 28 (C19orf28), transcript variant 2, mRNA.                                                      |
| 0,040787184 | -3,529468703 | NLGN4X       | Homo sapiens neuroligin 4, X-linked (NLGN4X), transcript variant 1, mRNA.                                                                     |
| 0,011018756 | -3,551879971 | SLC41A1      | Homo sapiens solute carrier family 41, member 1 (SLC41A1), mRNA.                                                                              |
| 0,030122276 | -3,649413353 | AGR2         | Homo sapiens anterior gradient homolog 2 (Xenopus laevis) (AGR2), mRNA.                                                                       |
| 0,003666484 | -3,695308871 | HES6         | Homo sapiens hairy and enhancer of split 6 (Drosophila) (HES6), mRNA.                                                                         |
| 0,011589666 | -3,769466927 | EGLN3        | Homo sapiens egl nine homolog 3 (C. elegans) (EGLN3), mRNA.                                                                                   |
| 0,002577405 | -3,78410596  | ZEB1         | Homo sapiens zinc finger E-box binding homeobox 1 (ZEB1), mRNA.                                                                               |
| 0,020945573 | -3,9178064   | NACC1        | Homo sapiens nucleus accumbens associated 1, BEN and BTB (POZ) domain containing (NACC1), mRNA.                                               |

|             |              |              |                                                                                                                                           |
|-------------|--------------|--------------|-------------------------------------------------------------------------------------------------------------------------------------------|
| 0,021242323 | -3,990029128 | HS.562504    | PM3-DT0037-231299-001-e06 DT0037 Homo sapiens cDNA, mRNA sequence                                                                         |
| 0,017473596 | -4,022689267 | PRKCSH       | Homo sapiens protein kinase C substrate 80K-H (PRKCSH), transcript variant 2, mRNA.                                                       |
| 0,02118148  | -4,168776104 | LGR4         | Homo sapiens leucine-rich repeat-containing G protein-coupled receptor 4 (LGR4), mRNA.                                                    |
| 0,041806093 | -4,238410596 | ASPH         | Homo sapiens aspartate beta-hydroxylase (ASPH), transcript variant 2, mRNA.                                                               |
| 0,007144075 | -4,397986222 | CDC2L2       | Homo sapiens cell division cycle 2-like 2 (PITSLRE proteins) (CDC2L2), transcript variant 1, mRNA. XM_001713745 XM_001713746 XM_001713747 |
| 0,011121191 | -4,408385093 | LOC100128007 | PREDICTED: Homo sapiens misc_RNA (LOC100128007), miscRNA.                                                                                 |
| 0,012849465 | -4,672122602 | PTPRQ        | PREDICTED: Homo sapiens protein tyrosine phosphatase, receptor type, Q (PTPRQ), mRNA.                                                     |
| 0,01039157  | -4,677934746 | PRELP        | Homo sapiens proline/arginine-rich end leucine-rich repeat protein (PRELP), transcript variant 2, mRNA.                                   |
| 0,019025771 | -4,804838925 | DNM1         | Homo sapiens dynamin 1 (DNM1), transcript variant 2, mRNA.                                                                                |
| 0,023606624 | -4,900303644 | CCDC80       | Homo sapiens coiled-coil domain containing 80 (CCDC80), transcript variant 1, mRNA.                                                       |
| 0,013074654 | -4,956937799 | SDHALP1      | Homo sapiens succinate dehydrogenase complex, subunit A, flavoprotein pseudogene 1 (SDHALP1) on chromosome 3.                             |
| 0,046544405 | -5,288706058 | MYOZ3        | Homo sapiens myozenin 3 (MYOZ3), mRNA.                                                                                                    |
| 0,004956804 | -5,776351518 | TTY17A       | Homo sapiens testis-specific transcript, Y-linked 17A (non-protein coding) (TTY17A), non-coding RNA.                                      |
| 0,016859484 | -6,71221865  | MYBBP1A      | Homo sapiens MYB binding protein (P160) 1a (MYBBP1A), mRNA.                                                                               |
| 0,005284639 | -7,129854369 | LAT1-3TM     | PREDICTED: Homo sapiens SLC7A5 pseudogene, transcript variant 2 (LAT1-3TM), misc RNA.                                                     |
| 0,002524003 | -7,938314366 | PPM1G        | Homo sapiens protein phosphatase 1G (formerly 2C), magnesium-dependent, gamma isoform (PPM1G), transcript variant 1, mRNA.                |
| 0,011749054 | -9,411090742 | GCK          | Homo sapiens glucokinase (hexokinase 4, maturity onset diabetes of the young 2) (GCK), transcript variant 1, mRNA.                        |
| 0,017821973 | -18,31955188 | SLC44A4      | Homo sapiens solute carrier family 44, member 4 (SLC44A4), mRNA.                                                                          |
| 0,000173863 | -26,32468997 | C10ORF107    | Homo sapiens chromosome 10 open reading frame 107 (C10orf107), mRNA.                                                                      |
